# Supplementary material for: Computational analysis of substituent effects on proton affinity and gas-phase basicity of TEMPO derivatives, and their hydrogen bonding interactions with water molecules
Source: Research Square preprint supplement (doi:10.21203/rs.3.rs-3881739/v1), 2024-01-29
Supplement: Supplementary file 1 [file be2e53b60e23b32f6bce7a38.docx]

## Computational analysis of substituent effects on the proton affinity and gas-phase basicity of TEMPO derivatives and their hydrogen bonding interactions with water molecules

Abolfazl Shiroudi[[1]](#footnote-1)*1,2🖂, Maciej Śmiechowski1, Jacek Czub1,2

& Mohamed A. Abdel-Rahman3🖂

1 Department of Physical Chemistry, Gdańsk University of Technology, Narutowicza 11/12, Gdańsk 80-233, Poland

2BioTechMed Center, Gdańsk University of Technology, Gdańsk 80-233, Poland

3 Department of Chemistry, Faculty of Science, Suez University, P.O. Box:43221, Suez, Egypt

**Supplementary Information**

**Table S1**. Cartesian coordinates of TEMPO derivatives and the protonated forms as well as hydration of the protonated forms optimized at the B3LYP/6-311++G(d,p) level of theory.

| **TEMPO**  0 2  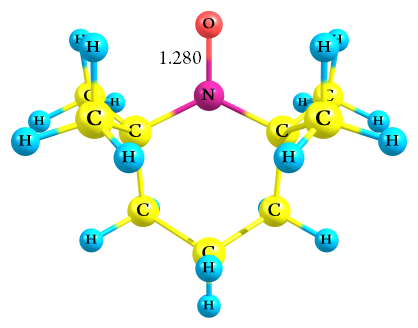 N -0.75060800 0.19830700 0.00000000  C -0.07133400 0.02719900 1.33348300  O -2.02276700 0.05555300 0.00000000  C -0.07133400 0.02719900 -1.33348300  C 1.39603100 0.48972100 1.24494700  C -0.17248400 -1.45024700 1.76608300  C -0.82457400 0.90408700 2.34514200  C -0.82457400 0.90408700 -2.34514200  C -0.17248400 -1.45024700 -1.76608300  C 1.39603100 0.48972100 -1.24494700  C 2.12496400 -0.01303100 0.00000000  H 1.90677900 0.16743200 2.15767900  H 1.41924800 1.58573200 1.24329700  H 0.17409400 -1.55724700 2.79772600  H 0.43075100 -2.10918500 1.13912600  H -1.21158400 -1.77966700 1.71363200  H -0.33014700 0.84126900 3.31841500  H -1.85809500 0.57664200 2.45111700  H -0.82661100 1.94871400 2.02464000  H -0.33014700 0.84126900 -3.31841500  H -0.82661100 1.94871400 -2.02464000  H -1.85809500 0.57664200 -2.45111700  H 0.17409400 -1.55724700 -2.79772600  H -1.21158400 -1.77966700 -1.71363200  H 0.43075100 -2.10918500 -1.13912600  H 1.90677900 0.16743200 -2.15767900  H 1.41924800 1.58573200 -1.24329700  H 2.19054800 -1.10592700 0.00000000  H 3.15552800 0.35504500 0.00000000  Zero-point correction= 0.260688 (Hartree/Particle)  Thermal correction to Energy= 0.272734  Thermal correction to Enthalpy= 0.273678  Thermal correction to Gibbs Free Energy= 0.223984  Sum of electronic and zero-point Energies= -483.595372  Sum of electronic and thermal Energies= -483.583326  Sum of electronic and thermal Enthalpies= -483.582382  Sum of electronic and thermal Free Energies= -483.632076  **TEMPO-CH3**  0 2  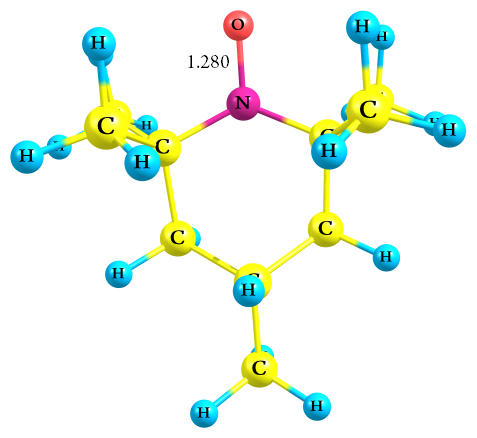 N -1.05578700 0.00000000 -0.24482300  C -0.39204100 1.33034800 -0.01651800  O -2.33559700 0.00000000 -0.21419000  C -0.39204100 -1.33034800 -0.01651800  C 1.10957300 1.23877900 -0.34726700  C -0.62475600 1.76808300 1.44481700  C -1.06172100 2.34216100 -0.95917400  C -1.06172000 -2.34216100 -0.95917400  C -0.62475500 -1.76808300 1.44481700  C 1.10957300 -1.23877900 -0.34726700  C 1.81303100 0.00000000 0.21417000  H 1.58946900 2.15327700 0.01712700  H 1.23200100 1.23619500 -1.43771900  H -0.28305700 2.79804400 1.58038000  H -0.08792800 1.13965300 2.15753900  H -1.68988700 1.72289400 1.67826100  H -0.57578400 3.31576100 -0.85165000  H -2.12094700 2.44724500 -0.72722800  H -0.96822800 2.02134700 -1.99950600  H -0.57578300 -3.31576100 -0.85165000  H -0.96822800 -2.02134700 -1.99950600  H -2.12094600 -2.44724500 -0.72722800  H -0.28305700 -2.79804400 1.58038000  H -1.68988600 -1.72289400 1.67826100  H -0.08792800 -1.13965300 2.15753900  H 1.58946900 -2.15327700 0.01712700  H 1.23200100 -1.23619500 -1.43771900  H 1.72462900 0.00000000 1.30711800  C 3.30626100 0.00000000 -0.13199400  H 3.80716300 0.88395000 0.27359900  H 3.80716300 -0.88394900 0.27359900  H 3.45662900 0.00000000 -1.21680800  Zero-point correction= 0.288239 (Hartree/Particle)  Thermal correction to Energy= 0.301845  Thermal correction to Enthalpy= 0.302789  Thermal correction to Gibbs Free Energy= 0.249797  Sum of electronic and zero-point Energies= -522.893395  Sum of electronic and thermal Energies= -522.879790  Sum of electronic and thermal Enthalpies= -522.878846  Sum of electronic and thermal Free Energies= -522.931838  **TEMPO-NH2**  0 2  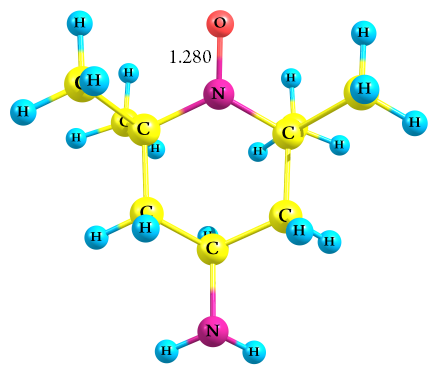 N -1.04624400 0.00000000 -0.23345000  C -0.37962600 1.33154500 -0.01786800  O -2.32525100 0.00000000 -0.18474900  C -0.37962600 -1.33154500 -0.01786800  C 1.11795100 1.23678200 -0.36224500  C -0.60507100 1.77885600 1.44201300  C -1.05451200 2.33759600 -0.96310800  C -1.05451200 -2.33759500 -0.96310800  C -0.60507100 -1.77885600 1.44201300  C 1.11795000 -1.23678300 -0.36224500  C 1.81397900 0.00000000 0.20175500  H 1.60529000 2.14939700 -0.00091600  H 1.24640200 1.22002900 -1.44962300  H -0.25121900 2.80537400 1.57259800  H -0.07576100 1.14709100 2.15749600  H -1.67054100 1.74752900 1.67618300  H -0.57051300 3.31286400 -0.86257200  H -2.11283600 2.44092900 -0.72613800  H -0.96432400 2.01179600 -2.00200500  H -0.57051500 -3.31286400 -0.86257200  H -0.96432500 -2.01179500 -2.00200500  H -2.11283700 -2.44092800 -0.72613900  H -0.25122100 -2.80537400 1.57259800  H -1.67054100 -1.74752900 1.67618300  H -0.07576100 -1.14709100 2.15749600  H 1.60529000 -2.14939800 -0.00091600  H 1.24640200 -1.22002900 -1.44962300  H 1.72248300 0.00000000 1.29817200  N 3.22105400 -0.00000100 -0.22543200  H 3.70704400 0.81665700 0.13296300  H 3.70704400 -0.81665900 0.13296200  Zero-point correction= 0.277599 (Hartree/Particle)  Thermal correction to Energy= 0.291064  Thermal correction to Enthalpy= 0.292008  Thermal correction to Gibbs Free Energy= 0.239309  Sum of electronic and zero-point Energies= -538.945849  Sum of electronic and thermal Energies= -538.932384  Sum of electronic and thermal Enthalpies= -538.931440  Sum of electronic and thermal Free Energies= -538.984140  **TEMPO-CHO**  0 2  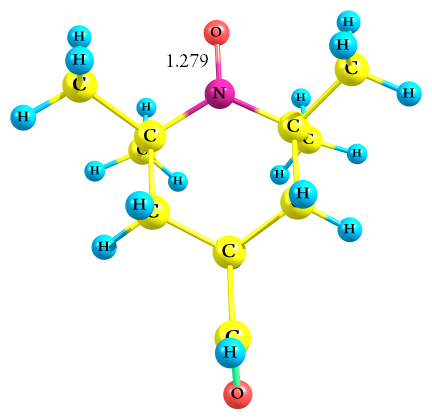 N 1.32243900 0.00004500 -0.21406700  C 0.64994800 -1.32960600 -0.01381500  O 2.59814400 0.00010300 -0.11723000  C 0.64982800 1.32963700 -0.01382100  C -0.82924900 -1.24621700 -0.43914600  C 0.78986700 -1.75815700 1.46143500  C 1.37327100 -2.34836800 -0.90817600  C 1.37305800 2.34846000 -0.90818700  C 0.78970800 1.75820600 1.46142700  C -0.82936200 1.24611200 -0.43915100  C -1.55697400 -0.00008600 0.08859500  H -1.32957500 -2.15782900 -0.09893500  H -0.88316000 -1.24389200 -1.53439500  H 0.44055100 -2.78715000 1.58200500  H 0.21138500 -1.12640400 2.13718600  H 1.83871600 -1.71173200 1.75890600  H 0.88042300 -3.32063300 -0.82450700  H 2.41525900 -2.45338500 -0.60900100  H 1.34701200 -2.03412200 -1.95424500  H 0.88012600 3.32068300 -0.82451900  H 1.34682400 2.03420900 -1.95425500  H 2.41503900 2.45356900 -0.60901500  H 0.44029400 2.78716700 1.58199400  H 1.83856200 1.71188300 1.75889600  H 0.21128800 1.12640000 2.13718100  H -1.32977100 2.15767800 -0.09894200  H -0.88327300 1.24377700 -1.53440100  H -1.59541700 -0.00008300 1.18040800  C -2.98970200 -0.00014000 -0.39866000  H -3.10543700 -0.00012300 -1.50690300  O -3.96292800 -0.00002600 0.31322900  Zero-point correction= 0.269533 (Hartree/Particle)  Thermal correction to Energy= 0.283797  Thermal correction to Enthalpy= 0.284741  Thermal correction to Gibbs Free Energy= 0.229215  Sum of electronic and zero-point Energies= -596.935545  Sum of electronic and thermal Energies= -596.921281  Sum of electronic and thermal Enthalpies= -596.920337  Sum of electronic and thermal Free Energies= -596.975863  **TEMPO-NO2**  0 2  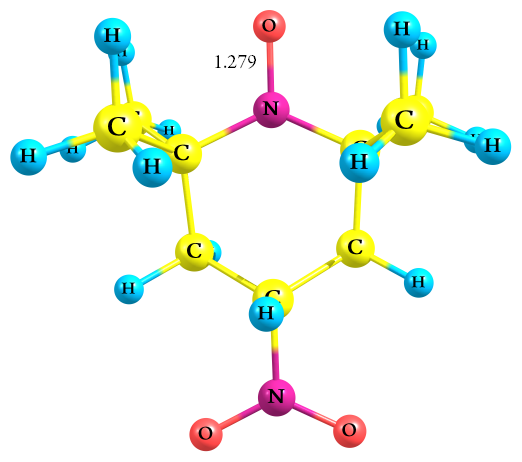 N -1.54002100 0.00000200 -0.25998000  C -0.88096800 1.33047000 -0.01618700  O -2.81887500 0.00000700 -0.24638100  C -0.88097700 -1.33046700 -0.01616300  C 0.62574700 1.24850100 -0.33443800  C -1.12923100 1.76660400 1.44272500  C -1.53279500 2.34609400 -0.96662500  C -1.53281200 -2.34610300 -0.96658400  C -1.12924400 -1.76657300 1.44275500  C 0.62573800 -1.24851500 -0.33441600  C 1.26939000 -0.00000500 0.24740400  H 1.11223800 2.14819900 0.04187700  H 0.76648100 1.23525700 -1.41995900  H -0.78704100 2.79503500 1.58413000  H -0.60741500 1.13754500 2.16664600  H -2.19756400 1.72315800 1.66008000  H -1.04854000 3.31889000 -0.84908600  H -2.59464200 2.44950800 -0.74761300  H -1.42573200 2.02768800 -2.00613400  H -1.04856300 -3.31890000 -0.84902900  H -1.42574900 -2.02771500 -2.00609800  H -2.59465900 -2.44950600 -0.74756900  H -0.78706200 -2.79500400 1.58417900  H -2.19757600 -1.72311500 1.66011000  H -0.60742300 -1.13750600 2.16666600  H 1.11222200 -2.14821100 0.04191400  H 0.76647400 -1.23529200 -1.41993700  H 1.22347900 0.00000600 1.34017000  N 2.78775300 -0.00000600 -0.01023400  O 3.34679300 -1.08253000 -0.08311400  O 3.34681400 1.08251800 -0.08296500  Zero-point correction= 0.263223 (Hartree/Particle)  Thermal correction to Energy= 0.277079  Thermal correction to Enthalpy= 0.278024  Thermal correction to Gibbs Free Energy= 0.223661  Sum of electronic and zero-point Energies= -688.155840  Sum of electronic and thermal Energies= -688.141983  Sum of electronic and thermal Enthalpies= -688.141039  Sum of electronic and thermal Free Energies= -688.195401  **TEMPO-H+** [H-atom bonded to the nitrogen atom of the NO moiety]  1 2  **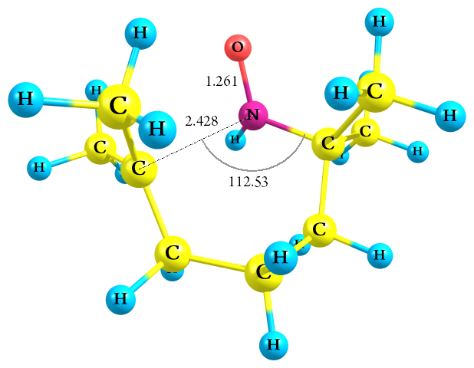** N -0.39053000 -0.91604200 -0.45766100  C -1.50969300 0.00908500 -0.02823900  O -0.24034600 -2.05062300 0.07073000  C 1.80786600 0.01520100 -0.01478900  C -1.10948600 1.44131700 -0.43845900  C -1.75708600 -0.15434800 1.47054400  C -2.74924800 -0.43654500 -0.83039300  C 2.47755600 -0.86011300 -1.00691600  C 1.91526100 -0.37565200 1.40750300  C 1.46996400 1.41024300 -0.39411200  C 0.17013200 2.02281300 0.17548200  H -1.94875000 2.08695900 -0.16680700  H -1.04248400 1.49744800 -1.53266100  H -2.58787600 0.49182600 1.75961100  H -0.89316800 0.11903200 2.07633300  H -2.02576300 -1.18246900 1.71134700  H -3.58934600 0.21814200 -0.58810700  H -3.02536500 -1.46154300 -0.57703000  H -2.57899800 -0.37357400 -1.90900200  H 3.54908700 -0.60276800 -0.96898200  H 2.15610300 -0.67657100 -2.03311800  H 2.39958800 -1.91801900 -0.75216400  H 2.98701900 -0.47677900 1.63534600  H 1.48999300 -1.37094500 1.57148600  H 1.48019500 0.34164700 2.09922700  H 2.31827900 1.99753600 0.00308000  H 1.49985800 1.52902600 -1.48025100  H 0.15316100 1.95255500 1.26503800  H 0.20297500 3.08993600 -0.05426900  H -0.17962600 -0.87615900 -1.46502600  Zero-point correction= 0.269235 (Hartree/Particle)  Thermal correction to Energy= 0.282761  Thermal correction to Enthalpy= 0.283705  Thermal correction to Gibbs Free Energy= 0.230488  Sum of electronic and zero-point Energies= -483.901831  Sum of electronic and thermal Energies= -483.888305  Sum of electronic and thermal Enthalpies= -483.887360  Sum of electronic and thermal Free Energies= -483.940578  **TEMPO-CH3-H+** [H-atom bonded to the nitrogen atom of the NO moiety]  1 2  **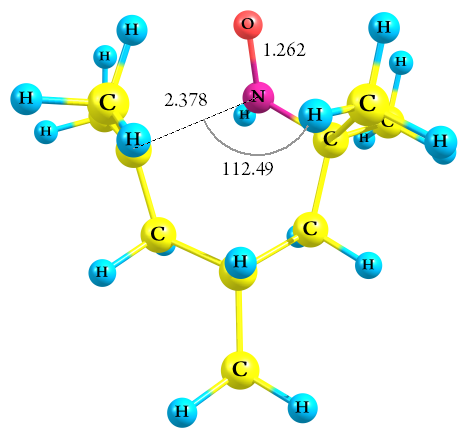** N -0.61666200 -1.11778300 -0.46929400  C -1.54206700 -0.00584500 -0.02201400  O -0.70532200 -2.27620500 0.02313800  C 1.66732300 -0.64173700 -0.00930100  C -0.88046700 1.33474600 -0.40004900  C -1.83128300 -0.15235700 1.47126200  C -2.83727300 -0.19388200 -0.83910300  C 2.17134800 -1.60772200 -1.01845500  C 1.70749700 -1.07452900 1.40670000  C 1.62012900 0.79997000 -0.35776100  C 0.48232000 1.67982300 0.22588400  H -1.59404800 2.11447400 -0.11993900  H -0.79560900 1.40052400 -1.49330900  H -2.52837900 0.63270800 1.76970200  H -0.93815900 -0.05951800 2.08872300  H -2.29207600 -1.11604900 1.68635300  H -3.54130800 0.60175300 -0.58563200  H -3.30277300 -1.15392500 -0.60933800  H -2.64971700 -0.14132800 -1.91541300  H 3.27117300 -1.55986600 -0.96740200  H 1.90101000 -1.34437700 -2.04209400  H 1.88960900 -2.63647700 -0.78985300  H 2.75173200 -1.34122000 1.62888700  H 1.13295700 -1.99334300 1.55453200  H 1.39163700 -0.31055600 2.11287800  H 2.57353100 1.18670800 0.04771000  H 1.67547700 0.93532000 -1.44179600  H 0.43507900 1.52665100 1.30754900  H -0.39791300 -1.09384600 -1.47553300  C 0.82025000 3.15747300 -0.02361600  H 0.05198500 3.80469800 0.40407100  H 1.77549100 3.42894800 0.43230600  H 0.88286000 3.37719800 -1.09373200  Zero-point correction= 0.297089 (Hartree/Particle)  Thermal correction to Energy= 0.312051  Thermal correction to Enthalpy= 0.312996  Thermal correction to Gibbs Free Energy= 0.256801  Sum of electronic and zero-point Energies= -523.199575  Sum of electronic and thermal Energies= -523.184613  Sum of electronic and thermal Enthalpies= -523.183669  Sum of electronic and thermal Free Energies= -523.239863  **TEMPO-NH2-H+** [H-atom bonded to the nitrogen atom of the NO moiety]  1 2  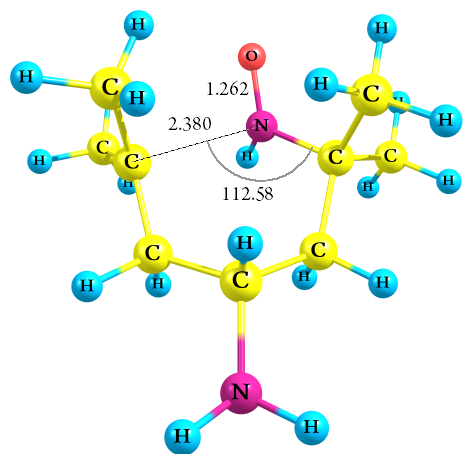 N -0.54798200 -1.13640300 -0.47130400  C -1.53642900 -0.08201700 -0.01947200  O -0.57242600 -2.30051400 0.01510900  C 1.70771500 -0.53293400 -0.00837100  C -0.95350900 1.29424000 -0.39276400  C -1.82203100 -0.25491900 1.47221100  C -2.81709600 -0.33819100 -0.84141000  C 2.26619400 -1.45837300 -1.02632700  C 1.77086000 -0.97669400 1.40367900  C 1.57480700 0.90262700 -0.34924000  C 0.38391500 1.71274100 0.23703000  H -1.70904300 2.03182000 -0.10571200  H -0.86098400 1.38013200 -1.48224400  H -2.55989800 0.49051500 1.77430700  H -0.93725800 -0.12161700 2.09416600  H -2.23368400 -1.24271500 1.67736100  H -3.56712000 0.41283200 -0.58389000  H -3.22567600 -1.32543300 -0.61903300  H -2.63049700 -0.26686200 -1.91663200  H 3.36157400 -1.34850700 -0.97378400  H 1.98275900 -1.19949800 -2.04745000  H 2.04334500 -2.50372300 -0.80809800  H 2.83269000 -1.15722400 1.63065900  H 1.27343800 -1.94113000 1.53795900  H 1.39109800 -0.24843500 2.11603400  H 2.49744000 1.35182100 0.06288100  H 1.61344200 1.06547900 -1.42854300  H 0.34565800 1.55350200 1.32253400  H -0.32940300 -1.09415400 -1.47694400  N 0.62933700 3.10483000 -0.12629700  H -0.16441600 3.69809500 0.08984900  H 1.43991700 3.49134700 0.34689300  Zero-point correction= 0.286206 (Hartree/Particle)  Thermal correction to Energy= 0.301061  Thermal correction to Enthalpy= 0.302005  Thermal correction to Gibbs Free Energy= 0.246052  Sum of electronic and zero-point Energies= -539.251135  Sum of electronic and thermal Energies= -539.236280  Sum of electronic and thermal Enthalpies= -539.235336  Sum of electronic and thermal Free Energies= -539.291288  **TEMPO-CHO-H+** [H-atom bonded to the nitrogen atom of the NO moiety]  1 2  **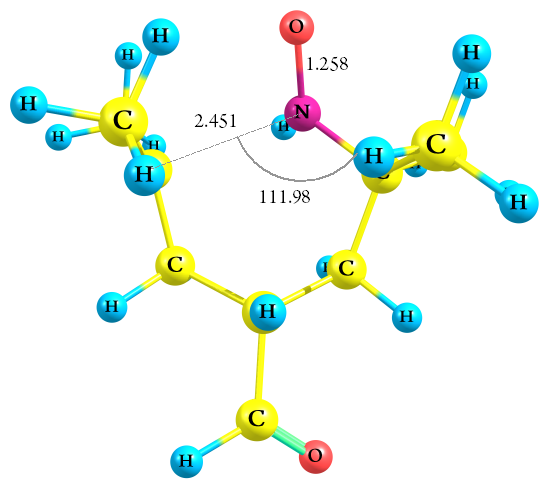** N -1.35049300 0.66824300 -0.47799400  C -0.22176500 1.56157000 -0.01076600  O -2.50081800 0.74329700 0.02449400  C -0.89137000 -1.69815300 -0.03389600  C 1.10335300 0.86316400 -0.37000400  C -0.38706000 1.85010200 1.48032800  C -0.35533900 2.86227300 -0.83000200  C -1.82481400 -2.15169300 -1.09266700  C -1.38271600 -1.73296000 1.35972000  C 0.56460700 -1.66099700 -0.32737200  C 1.38329100 -0.49362400 0.28328300  H 1.91243700 1.54470800 -0.09939900  H 1.17949300 0.75711300 -1.45929200  H 0.42848800 2.49975600 1.80281500  H -0.36412800 0.94927300 2.09449400  H -1.32868900 2.36220600 1.67597100  H 0.45399100 3.54261500 -0.55613100  H -1.30717000 3.35373500 -0.62185200  H -0.28158600 2.67462200 -1.90491800  H -1.80961400 -3.25427100 -1.06572400  H -1.51177200 -1.86756200 -2.09841900  H -2.85515300 -1.84887400 -0.89912800  H -1.74780800 -2.75280800 1.55275500  H -2.25957300 -1.08717700 1.47844700  H -0.63017100 -1.48588700 2.10528200  H 0.94911600 -2.60656400 0.10019800  H 0.74078200 -1.71591400 -1.40477700  H 1.18929700 -0.45046600 1.36269200  H -1.32748400 0.45470000 -1.48556000  C 2.87105600 -0.86446800 0.18443000  H 3.11752200 -1.88635600 0.54558300  O 3.71957000 -0.12727700 -0.22891800  Zero-point correction= 0.277660 (Hartree/Particle)  Thermal correction to Energy= 0.293298  Thermal correction to Enthalpy= 0.294242  Thermal correction to Gibbs Free Energy= 0.235573  Sum of electronic and zero-point Energies= -597.234482  Sum of electronic and thermal Energies= -597.218845  Sum of electronic and thermal Enthalpies= -597.217900  Sum of electronic and thermal Free Energies= -597.276570  **TEMPO-NO2-H+** [H-atom bonded to the nitrogen atom of the NO moiety]  1 2  **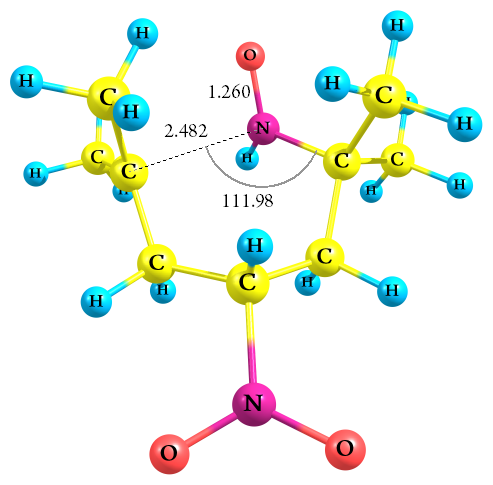** N 1.77386200 -0.21288300 -0.44850000  C 0.99062300 -1.44587700 -0.05008000  O 2.84715300 0.09657700 0.13369800  C 0.50612400 1.87531500 -0.00941300  C -0.48073700 -1.23202800 -0.46767700  C 1.17235700 -1.70023800 1.44598500  C 1.58280700 -2.60845800 -0.87228700  C 1.27786600 2.67345100 -0.98933800  C 0.86820500 2.02592600 1.41468800  C -0.80060600 1.31552600 -0.42188400  C -1.18927200 -0.04153800 0.17646500  H -1.02476600 -2.13902100 -0.20288200  H -0.54926300 -1.14297900 -1.55840800  H 0.59948100 -2.58673600 1.72342500  H 0.83400200 -0.87015300 2.06748800  H 2.21997000 -1.88269700 1.68262800  H 1.03848400 -3.52728100 -0.64332700  H 2.63427600 -2.75759100 -0.62171100  H 1.49822200 -2.43022900 -1.94800000  H 0.85683300 3.69275800 -0.95761000  H 1.16601600 2.32781000 -2.01767700  H 2.33000800 2.76385000 -0.71389100  H 0.89065400 3.10190100 1.64043800  H 1.89528100 1.67992700 1.58281100  H 0.18916900 1.53635800 2.10902600  H -1.54748000 2.05395500 -0.07329600  H -0.89290700 1.28898800 -1.50996800  H -1.06438300 -0.05187500 1.26069700  H 1.74854700 -0.00235900 -1.45646600  N -2.73220800 -0.20193100 0.03294500  O -3.16972600 -1.33152900 0.09245900  O -3.38716900 0.81952700 -0.07780100  Zero-point correction= 0.271177 (Hartree/Particle)  Thermal correction to Energy= 0.287415  Thermal correction to Enthalpy= 0.288359  Thermal correction to Gibbs Free Energy= 0.226811  Sum of electronic and zero-point Energies= -688.446809  Sum of electronic and thermal Energies= -688.430571  Sum of electronic and thermal Enthalpies= -688.429627  Sum of electronic and thermal Free Energies= -688.491174  **TEMPO-H+** [H-atom bonded to the oxygen atom of the NO moiety]  1 2  **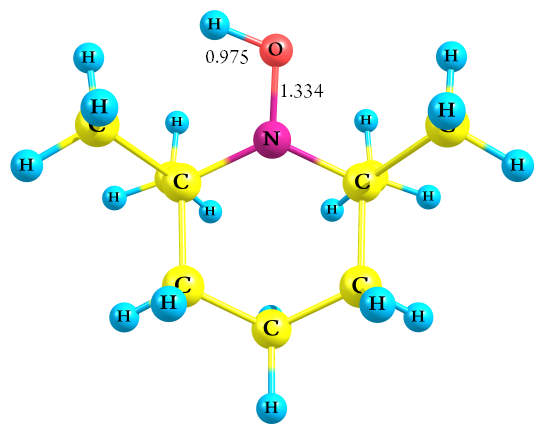**  N 0.00149217 -0.68198905 -0.14464466  C -1.35428271 -0.02921464 -0.01223934  O 0.05053875 -2.01388824 -0.08157878  C 1.36445740 -0.05477763 -0.01554261  C -1.23614023 1.41742138 -0.53472599  C -1.76276447 -0.07653609 1.47920026  C -2.36027748 -0.82227650 -0.86628510  C 2.35139500 -0.85753438 -0.87955535  C 1.77785032 -0.12729576 1.47397260  C 1.26492509 1.39964222 -0.52274809  C 0.01761720 2.14615712 -0.05245189  H -2.14231854 1.94211933 -0.22293718  H -1.24333001 1.39854657 -1.62932688  H -2.78945361 0.28684821 1.55677817  H -1.13120199 0.55614445 2.10053550  H -1.73488665 -1.09340597 1.87675419  H -3.29705280 -0.26312756 -0.88551404  H -2.61716638 -1.80361521 -0.44825885  H -2.02009441 -0.93975021 -1.89716043  H 3.30220159 -0.32148095 -0.87987429  H 2.00667919 -0.93347549 -1.91264647  H 2.52559015 -1.85855904 -0.48718290  H 2.80976369 0.22105896 1.54794789  H 1.73835568 -1.15285216 1.84356007  H 1.16113241 0.50633722 2.11063073  H 2.17374311 1.91021039 -0.19667475  H 1.28651962 1.39056529 -1.61721819  H 0.01224462 2.26571474 1.03473282  H 0.02485109 3.15667018 -0.46653615  H -0.85701270 -2.35643379 -0.18021335  Zero-point correction= 0.273030 (Hartree/Particle)  Thermal correction to Energy= 0.285460  Thermal correction to Enthalpy= 0.286404  Thermal correction to Gibbs Free Energy= 0.236029  Sum of electronic and zero-point Energies= -483.933967  Sum of electronic and thermal Energies= -483.921537  Sum of electronic and thermal Enthalpies= -483.920593  Sum of electronic and thermal Free Energies= -483.970968  **TEMPO-CH3-H+** [H-atom bonded to the oxygen atom of the NO moiety]  1 2  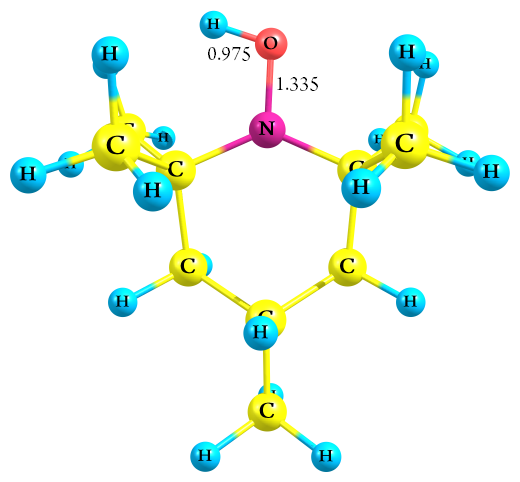  N 0.98600900 -0.03876900 -0.19009400  C 0.31881500 -1.37293000 -0.00129300  O 2.31484500 -0.14132700 -0.25883300  C 0.40300000 1.33874800 0.00362200  C -1.17490300 -1.20921800 -0.35037000  C 0.53342800 -1.80408400 1.46986500  C 0.98243200 -2.38531400 -0.95077400  C 1.13870900 2.31292100 -0.93538000  C 0.62634200 1.74811700 1.47915500  C -1.09341700 1.27646700 -0.36193700  C -1.83906800 0.05897300 0.19595000  H -1.68327000 -2.10126900 0.02401600  H -1.28504900 -1.22265300 -1.44041200  H 0.14539000 -2.81877000 1.57696500  H 0.00371500 -1.16373100 2.17452700  H 1.59396000 -1.81728900 1.72485900  H 0.41019800 -3.31321300 -0.89739700  H 2.01168800 -2.60350600 -0.66882900  H 0.96139100 -2.03501300 -1.98455300  H 0.61817400 3.27113200 -0.89883900  H 1.13136300 1.96753600 -1.97113800  H 2.16891500 2.53016100 -0.62651700  H 0.30743500 2.78637900 1.59051500  H 1.67919400 1.68746300 1.76344600  H 0.04500300 1.13875100 2.16901600  H -1.54419800 2.20495700 -0.00166400  H -1.19257600 1.28241100 -1.45313400  H -1.77028900 0.06252700 1.28962800  C -3.32573100 0.10843300 -0.17641700  H -3.85843500 -0.75502800 0.22844300  H -3.80050900 1.00840400 0.22139100  H -3.46247500 0.10792600 -1.26205100  H 2.68190800 0.75213100 -0.39147700  Zero-point correction= 0.300685 (Hartree/Particle)  Thermal correction to Energy= 0.314641  Thermal correction to Enthalpy= 0.315585  Thermal correction to Gibbs Free Energy= 0.261997  Sum of electronic and zero-point Energies= -523.232670  Sum of electronic and thermal Energies= -523.218714  Sum of electronic and thermal Enthalpies= -523.217770  Sum of electronic and thermal Free Energies= -523.271358  **TEMPO-NH2-H+** [H-atom bonded to the oxygen atom of the NO moiety]  1 2  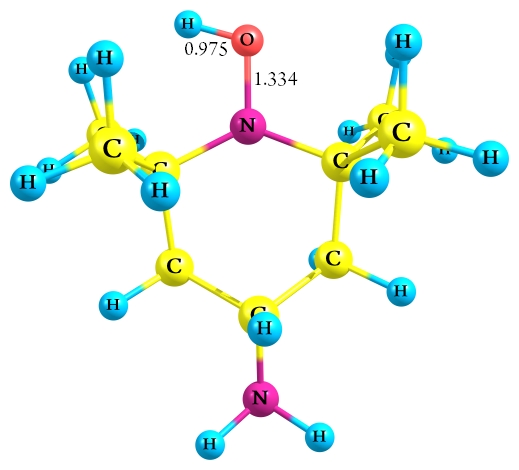  N 0.97306639 -0.06130151 -0.18533655  C 0.27280743 -1.37943827 -0.00065022  O 2.29880975 -0.19587350 -0.24662750  C 0.42191758 1.33032616 0.00341449  C -1.21395027 -1.17855999 -0.35153094  C 0.48266038 -1.82335301 1.46766070  C 0.90884287 -2.40298099 -0.95773685  C 1.17702693 2.28215595 -0.94338943  C 0.66076116 1.74179604 1.47637543  C -1.07284296 1.30094667 -0.36378240  C -1.84409243 0.10304824 0.19908696  H -1.74663199 -2.05746444 0.02182481  H -1.33815665 -1.17249124 -1.43846165  H 0.06071450 -2.82451895 1.57389827  H -0.01919002 -1.16792161 2.17888806  H 1.54404620 -1.87446861 1.71412503  H 0.31616427 -3.31798319 -0.90601008  H 1.93394507 -2.64485116 -0.68005962  H 0.89087231 -2.04751234 -1.98966014  H 0.68056801 3.25309402 -0.90967315  H 1.15668276 1.93163852 -1.97708757  H 2.21342616 2.47441047 -0.63884356  H 0.35544695 2.78430855 1.58611774  H 1.71506242 1.67011002 1.75281116  H 0.07738831 1.14203156 2.17298229  H -1.50568127 2.23948026 -0.00610658  H -1.18831977 1.29269457 -1.45164148  H -1.77232592 0.10425595 1.29757227  N -3.22296541 0.18316309 -0.27441896  H -3.77026851 -0.61715282 0.02620368  H -3.69204213 1.01499490 0.06988766  H 2.68833024 0.68765764 -0.38214500  Zero-point correction= 0.289843 (Hartree/Particle)  Thermal correction to Energy= 0.303687  Thermal correction to Enthalpy= 0.304632  Thermal correction to Gibbs Free Energy= 0.251264  Sum of electronic and zero-point Energies= -539.283833  Sum of electronic and thermal Energies= -539.269989  Sum of electronic and thermal Enthalpies= -539.269045  Sum of electronic and thermal Free Energies= -539.322412  **TEMPO-CHO-H+** [H-atom bonded to the oxygen atom of the NO moiety]  1 2  **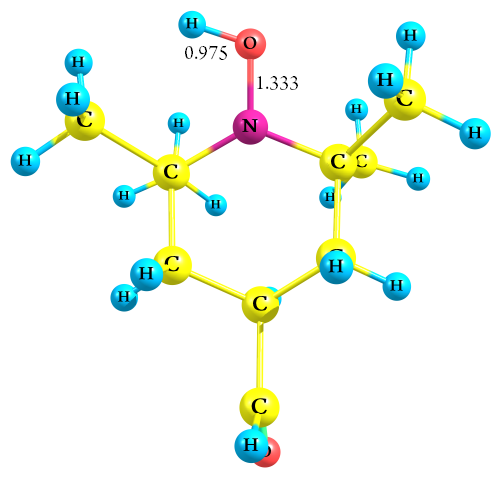**  N 1.25113290 -0.00300872 -0.16017503  C 0.59852850 -1.35384082 -0.00057859  O 2.58357633 0.04161001 -0.15427601  C 0.63556330 1.36032053 0.00016354  C -0.86899997 -1.22995617 -0.45848397  C 0.70923408 -1.76929720 1.48573876  C 1.34399008 -2.36322562 -0.89355165  C 1.39796457 2.34689656 -0.90099731  C 0.77673277 1.77432899 1.48472204  C -0.84065151 1.27003503 -0.44047050  C -1.58037355 0.02524188 0.06693574  H -1.38173951 -2.13475863 -0.12285743  H -0.90170893 -1.23255534 -1.55349992  H 0.33790149 -2.79206453 1.57642527  H 0.11447577 -1.13383641 2.13956609  H 1.74428590 -1.75526257 1.83377565  H 0.77886680 -3.29663381 -0.88970758  H 2.34099565 -2.62696096 -0.51983001  H 1.41805889 -2.02061022 -1.92767207  H 0.86595963 3.29959159 -0.87447896  H 1.42494038 2.00306887 -1.93684057  H 2.41652370 2.51727641 -0.55504656  H 0.43104130 2.80584557 1.57504537  H 1.81902358 1.73642681 1.80386483  H 0.17520052 1.15742840 2.15153707  H -1.32946507 2.18076815 -0.08644361  H -0.88438050 1.29297963 -1.53479129  H -1.63809869 0.01494302 1.15764015  C -3.02623239 0.03729023 -0.42850817  H -3.15228289 0.09891164 -1.53160837  O -3.97518499 -0.01832744 0.30344898  H 2.92080566 -0.86651760 -0.26705596  Zero-point correction= 0.281568 (Hartree/Particle)  Thermal correction to Energy= 0.296272  Thermal correction to Enthalpy= 0.297217  Thermal correction to Gibbs Free Energy= 0.240494  Sum of electronic and zero-point Energies= -597.265126  Sum of electronic and thermal Energies= -597.250422  Sum of electronic and thermal Enthalpies= -597.249478  Sum of electronic and thermal Free Energies= -597.306200  **TEMPO-NO2-H+** [H-atom bonded to the oxygen atom of the NO moiety]  1 2  **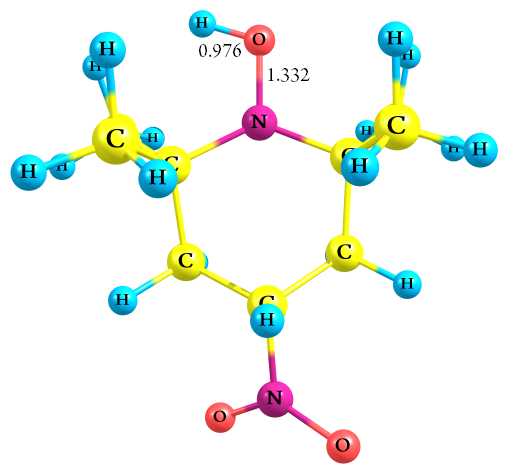**  N -1.46079500 0.03017800 -0.21587900  C -0.80245000 1.37687400 -0.06399600  O -2.78286700 0.12721700 -0.34257800  C -0.88403100 -1.33526000 0.07869800  C 0.70147400 1.20463600 -0.35767500  C -1.06687400 1.87869400 1.37576600  C -1.42530600 2.34270700 -1.08653200  C -1.58017800 -2.36344500 -0.83189800  C -1.16002300 -1.66364300 1.56562100  C 0.62433300 -1.29832300 -0.24378200  C 1.30215300 -0.04332400 0.28355200  H 1.21468300 2.09684300 0.00191300  H 0.85459600 1.15260600 -1.43999600  H -0.67982400 2.89677400 1.44766400  H -0.56800700 1.27501400 2.13378500  H -2.13611800 1.90511100 1.58901900  H -0.85551100 3.27308100 -1.05469100  H -2.46389500 2.57162800 -0.85224700  H -1.36601000 1.94362200 -2.10084200  H -1.06006400 -3.31646000 -0.72305800  H -1.53533500 -2.07642900 -1.88432700  H -2.61978300 -2.56548600 -0.54653400  H -0.83530100 -2.69008400 1.74737500  H -2.22416900 -1.60091200 1.80243300  H -0.61697900 -1.01094200 2.24754900  H 1.07423500 -2.19588500 0.18226200  H 0.77107600 -1.35585700 -1.32477000  H 1.27534300 0.01844800 1.37283100  N 2.80696900 -0.06201200 -0.02403600  O 3.25543600 -1.02396000 -0.61995600  O 3.43267100 0.90665600 0.36392400  H -3.14865400 -0.77104200 -0.44861100  Zero-point correction= 0.275395 (Hartree/Particle)  Thermal correction to Energy= 0.290507  Thermal correction to Enthalpy= 0.291452  Thermal correction to Gibbs Free Energy= 0.233614  Sum of electronic and zero-point Energies= -688.479365  Sum of electronic and thermal Energies= -688.464252  Sum of electronic and thermal Enthalpies= -688.463308  Sum of electronic and thermal Free Energies= -688.521145  **TEMPO-H2O** [H-atom bonded to the O-atom of the NO moiety in planar mode]  0 2  **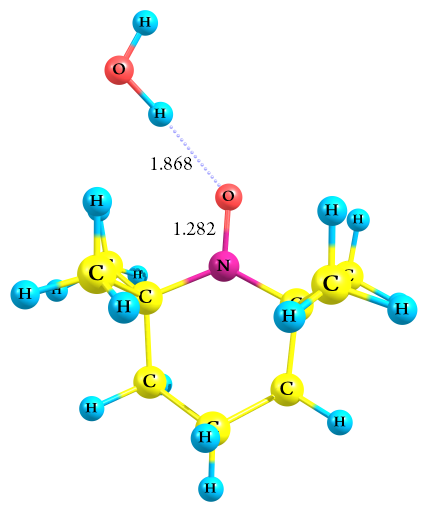** N 0.10223900 -0.34143500 -0.34287100  C -1.24390200 -0.93880900 -0.02226300  O 1.06096100 -1.18579500 -0.45057100  C 0.48875200 1.09751900 -0.11056000  C -2.35304900 0.11165000 -0.22439100  C -1.22287700 -1.46443300 1.42814000  C -1.46862300 -2.11308600 -0.98692700  C 1.56157600 1.46869500 -1.14687200  C 1.07095400 1.24509400 1.31075600  C -0.74147800 2.00508400 -0.31122400  C -2.01241600 1.48328000 0.35493900  H -3.27385100 -0.28507500 0.21405200  H -2.54041400 0.22342200 -1.29868600  H -2.13344700 -2.03746400 1.62299100  H -1.16968500 -0.65782700 2.16120900  H -0.36336000 -2.12073600 1.57396000  H -2.46517700 -2.53010400 -0.81888700  H -0.72755200 -2.89615300 -0.83224900  H -1.40473900 -1.77928700 -2.02533500  H 1.77501100 2.53806400 -1.06620900  H 1.20603400 1.26533700 -2.15994300  H 2.49021700 0.92314400 -0.98637500  H 1.45997400 2.25914800 1.43705700  H 1.89506300 0.54649200 1.46194800  H 0.32105500 1.07441400 2.08543300  H -0.48286600 3.00122000 0.05995900  H -0.92892400 2.11036300 -1.38622500  H -1.89147000 1.43014400 1.44162100  H -2.83836300 2.17738600 0.17244900  H 2.87368800 -1.09564400 -0.00738700  O 3.78922400 -0.97578000 0.30136100  H 4.20803100 -1.83415600 0.19479900  Zero-point correction= 0.284843 (Hartree/Particle)  Thermal correction to Energy= 0.300427  Thermal correction to Enthalpy= 0.301371  Thermal correction to Gibbs Free Energy= 0.242604  Sum of electronic and zero-point Energies= -560.039944  Sum of electronic and thermal Energies= -560.024360  Sum of electronic and thermal Enthalpies= -560.023416  Sum of electronic and thermal Free Energies= -560.082184  **TEMPO-CH3-H2O**[H-atom bonded to the O-atom of the NO moiety in planar mode]  0 2  **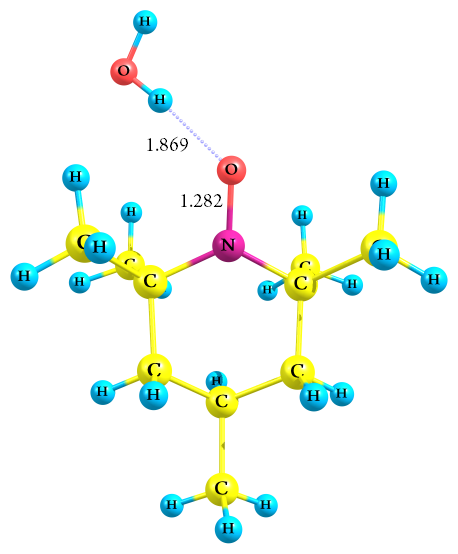** N 0.52240500 0.39790700 -0.33757300  C 0.40668800 -1.08899400 -0.12366100  O 1.70707700 0.88068800 -0.42336000  C -0.55786800 1.39865100 -0.02492300  C -1.05179700 -1.53466600 -0.34573700  C 0.89261300 -1.43904000 1.29830100  C 1.30704100 -1.78317800 -1.15886600  C -0.37450000 2.58888000 -0.97951200  C -0.38426100 1.88071300 1.43053200  C -1.94558000 0.77043000 -0.25043400  C -2.10393300 -0.64211000 0.31681300  H -1.13994600 -2.56577900 0.01176000  H -1.25426100 -1.56046900 -1.42378900  H 0.92094600 -2.52619800 1.41196400  H 0.23329000 -1.03826000 2.07023200  H 1.90033400 -1.05614200 1.46501800  H 1.15318400 -2.86370300 -1.09316500  H 2.36210400 -1.57796800 -0.98380100  H 1.05048900 -1.46102700 -2.17103000  H -1.17927300 3.31024300 -0.81442100  H -0.41387900 2.26019700 -2.02079600  H 0.58172800 3.08273000 -0.81144200  H -1.06414000 2.71484400 1.62384900  H 0.63931600 2.22438200 1.58855500  H -0.60039000 1.09497700 2.15601900  H -2.69149000 1.44660300 0.18024000  H -2.14596000 0.73111700 -1.32840200  H -1.92691800 -0.61848100 1.39866300  C -3.52041100 -1.18162900 0.08889100  H -3.63135100 -2.18867800 0.50135700  H -4.26932400 -0.54123000 0.56401800  H -3.75424800 -1.23191700 -0.97988200  H 3.38304600 0.18420400 0.02202300  O 4.20503500 -0.23753300 0.32933000  H 4.88506200 0.43562300 0.23985700  Zero-point correction= 0.312524 (Hartree/Particle)  Thermal correction to Energy= 0.329605  Thermal correction to Enthalpy= 0.330549  Thermal correction to Gibbs Free Energy= 0.268741  Sum of electronic and zero-point Energies= -599.337947  Sum of electronic and thermal Energies= -599.320866  Sum of electronic and thermal Enthalpies= -599.319922  Sum of electronic and thermal Free Energies= -599.381730  **TEMPO-NH2-H2O** [H-atom bonded to the O-atom of the NO moiety in planar mode]  0 2  **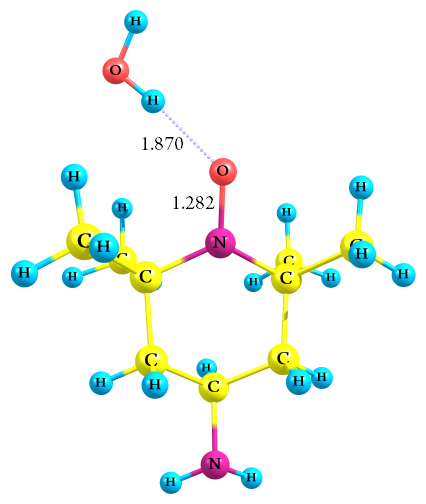** N 0.50727500 0.40373800 -0.33209600  C 0.41358000 -1.08614700 -0.12653900  O 1.68434800 0.90534000 -0.40906800  C -0.59089200 1.38733600 -0.02584900  C -1.03707500 -1.55101000 -0.35549300  C 0.90729900 -1.43648600 1.29303900  C 1.32305100 -1.76121000 -1.16650100  C -0.42603100 2.57565800 -0.98651400  C -0.42612500 1.88024000 1.42725600  C -1.96598200 0.73610900 -0.25606800  C -2.09347400 -0.67486600 0.31326500  H -1.11467800 -2.58427200 0.00027600  H -1.25429100 -1.56971000 -1.42861300  H 0.94283100 -2.52370200 1.40422800  H 0.24937100 -1.04096100 2.06892700  H 1.91355000 -1.04812300 1.45594400  H 1.18760400 -2.84439300 -1.10522400  H 2.37454700 -1.53873900 -0.99109300  H 1.05907300 -1.43923200 -2.17659800  H -1.24130300 3.28588600 -0.82504800  H -0.46090300 2.24100800 -2.02586600  H 0.52286400 3.08392800 -0.81992600  H -1.12664300 2.69757300 1.61869500  H 0.58870500 2.25106200 1.58007800  H -0.61929000 1.09253800 2.15711300  H -2.72607400 1.39591300 0.17684000  H -2.17282600 0.67825800 -1.32967800  H -1.91042800 -0.64829600 1.39780900  N -3.42906000 -1.20270600 -0.00034700  H -3.53689300 -2.14762300 0.35606200  H -4.15239400 -0.63681400 0.43337100  H 3.37256400 0.23021400 0.02995600  O 4.19768800 -0.18638600 0.33543500  H 4.87471300 0.48888500 0.23934300  Zero-point correction= 0.301837 (Hartree/Particle)  Thermal correction to Energy= 0.318806  Thermal correction to Enthalpy= 0.319750  Thermal correction to Gibbs Free Energy= 0.258165  Sum of electronic and zero-point Energies= -615.390398  Sum of electronic and thermal Energies= -615.373429  Sum of electronic and thermal Enthalpies= -615.372485  Sum of electronic and thermal Free Energies= -615.434071  **TEMPO-CHO-H2O** [H-atom bonded to the O-atom of the NO moiety in planar mode]  0 2  **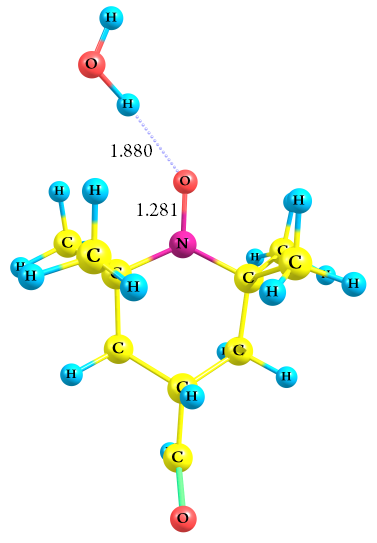** N -0.82872000 0.40003300 -0.34301200  C 0.13367100 1.51237500 -0.02573600  O -2.06429100 0.73816200 -0.36622900  C -0.52923400 -1.06683300 -0.18398100  C 1.57599900 1.07533400 -0.34465700  C -0.02198100 1.90649800 1.45734400  C -0.23428400 2.71126200 -0.91395000  C -1.39043100 -1.83597200 -1.19942500  C -0.89245600 -1.51734400 1.24619200  C 0.95803900 -1.33143200 -0.49590300  C 1.92269100 -0.33326900 0.16108000  H 2.25370800 1.81851300 0.08574900  H 1.72236100 1.10252700 -1.43098300  H 0.56147700 2.80835900 1.66053000  H 0.32185300 1.12368400 2.13486800  H -1.07028700 2.11618300 1.67548000  H 0.48849200 3.51501000 -0.75144100  H -1.23092800 3.08057900 -0.67713000  H -0.21232500 2.43370300 -1.97041700  H -1.09958100 -2.88972500 -1.18435300  H -1.23495900 -1.44992500 -2.20971400  H -2.45073300 -1.77241000 -0.96007000  H -0.77954200 -2.60205800 1.32197900  H -1.93068500 -1.27069100 1.47190400  H -0.25148200 -1.06048100 2.00188100  H 1.18613000 -2.35342800 -0.17995300  H 1.10367800 -1.29495400 -1.58210600  H 1.86277400 -0.38582100 1.25066000  C 3.34915600 -0.67258100 -0.21502800  H 3.55639500 -0.67121000 -1.30972200  O 4.22799800 -0.92935100 0.56930300  H -3.62731900 -0.17158300 0.14772200  O -4.34612200 -0.73135500 0.48873000  H -5.13569100 -0.18437400 0.45615300  Zero-point correction= 0.293714 (Hartree/Particle)  Thermal correction to Energy= 0.311478  Thermal correction to Enthalpy= 0.312422  Thermal correction to Gibbs Free Energy= 0.248081  Sum of electronic and zero-point Energies= -673.379753  Sum of electronic and thermal Energies= -673.361990  Sum of electronic and thermal Enthalpies= -673.361046  Sum of electronic and thermal Free Energies= -673.425386  **TEMPO-NO2-H2O** [H-atom bonded to the O-atom of the NO moiety in planar mode]  0 2  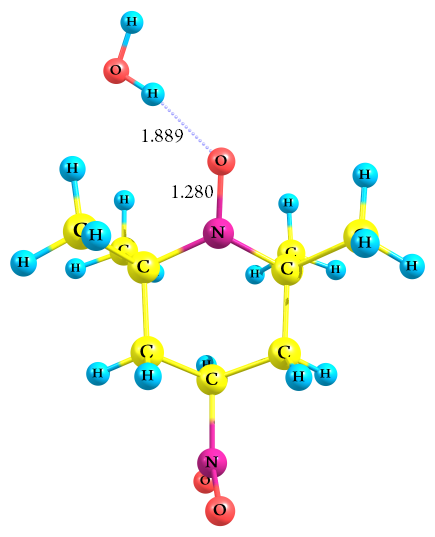 N 1.06313900 0.39782400 -0.34862600  C 0.71365700 -1.05315300 -0.14096700  O 2.30750200 0.68354200 -0.44537200  C 0.16606000 1.55668000 -0.00218700  C -0.79775700 -1.26042800 -0.37401800  C 1.13448500 -1.49271600 1.27678400  C 1.48274400 -1.87801000 -1.18589400  C 0.52801700 2.71988100 -0.93855100  C 0.42307300 1.97582900 1.45987700  C -1.30917900 1.17526700 -0.23555300  C -1.64650500 -0.20256200 0.32142000  H -1.06111400 -2.26057200 -0.01998400  H -1.01658800 -1.22191100 -1.44399700  H 0.97036400 -2.56815800 1.38359900  H 0.56466300 -0.98815000 2.05920300  H 2.19533700 -1.29685800 1.43697100  H 1.15073500 -2.91802300 -1.13165200  H 2.55592800 -1.85340700 -1.00446600  H 1.28635900 -1.50565600 -2.19385100  H -0.14904300 3.55741100 -0.75248000  H 0.43089900 2.42125300 -1.98462300  H 1.55172400 3.04958300 -0.76820500  H -0.11407700 2.90292600 1.67599600  H 1.48940200 2.15083200 1.61004100  H 0.09558200 1.22229000 2.17804500  H -1.93759700 1.94331800 0.22361900  H -1.52588600 1.17051100 -1.30651600  H -1.55894100 -0.24661400 1.40478100  N -3.12279700 -0.49817600 0.07392900  H 3.85816600 -0.28647500 0.02745000  O 4.53661300 -0.89280200 0.37010100  H 5.36966600 -0.41936600 0.29522500  O -3.51139300 -0.50073100 -1.08431600  O -3.82091300 -0.71440700 1.05312000  Zero-point correction= 0.287750 (Hartree/Particle)  Thermal correction to Energy= 0.305985  Thermal correction to Enthalpy= 0.306930  Thermal correction to Gibbs Free Energy= 0.241114  Sum of electronic and zero-point Energies= -764.600829  Sum of electronic and thermal Energies= -764.582594  Sum of electronic and thermal Enthalpies= -764.581650  Sum of electronic and thermal Free Energies= -764.647466  **TEMPO-H2O** [H-atom bonded to the O-atom of the NO moiety in top mode]  0 2  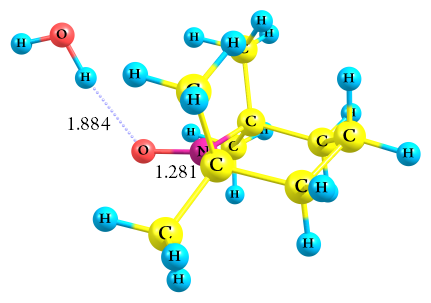 N 0.17704500 0.00008400 0.55869700  C -0.36142600 1.33503300 0.11246600  O 1.36641600 0.00038000 1.03443700  C -0.36075300 -1.33514500 0.11250200  C -1.88927300 1.24591600 -0.07093800  C 0.34112300 1.75459400 -1.19618600  C -0.03688500 2.35445500 1.21446200  C -0.03565500 -2.35437500 1.21451200  C 0.34197900 -1.75436900 -1.19616100  C -1.88864600 -1.24679900 -0.07086100  C -2.34782900 -0.00058000 -0.82580300  H -2.21906900 2.15674900 -0.57985500  H -2.36330700 1.25004700 0.91765600  H 0.06889100 2.78582700 -1.43768000  H 0.05566000 1.12629600 -2.04133900  H 1.42522300 1.70159100 -1.08415800  H -0.47768800 3.31923700 0.94965800  H 1.03868200 2.47967500 1.33102700  H -0.45228500 2.03581600 2.17349200  H -0.47596600 -3.31939000 0.94974000  H -0.45119300 -2.03593200 2.17354800  H 1.03998000 -2.47903800 1.33105100  H 0.07027200 -2.78574800 -1.43761800  H 1.42605400 -1.70079600 -1.08416700  H 0.05616200 -1.12624300 -2.04132300  H -2.21800700 -2.15782700 -0.57970900  H -2.36265200 -1.25109500 0.91774700  H -1.96174100 -0.00051700 -1.84992500  H -3.43879200 -0.00085800 -0.91025600  H 2.93839900 0.00058300 -0.00442000  O 3.63649200 0.00061600 -0.68163000  H 4.46300500 0.00068000 -0.19075500  Zero-point correction= 0.284667 (Hartree/Particle)  Thermal correction to Energy= 0.300322  Thermal correction to Enthalpy= 0.301266  Thermal correction to Gibbs Free Energy= 0.241550  Sum of electronic and zero-point Energies= -560.039435  Sum of electronic and thermal Energies= -560.023779  Sum of electronic and thermal Enthalpies= -560.022835  Sum of electronic and thermal Free Energies= -560.082552  **TEMPO-CH3-H2O**[H-atom bonded to the O-atom of the NO moiety in top mode]  0 2  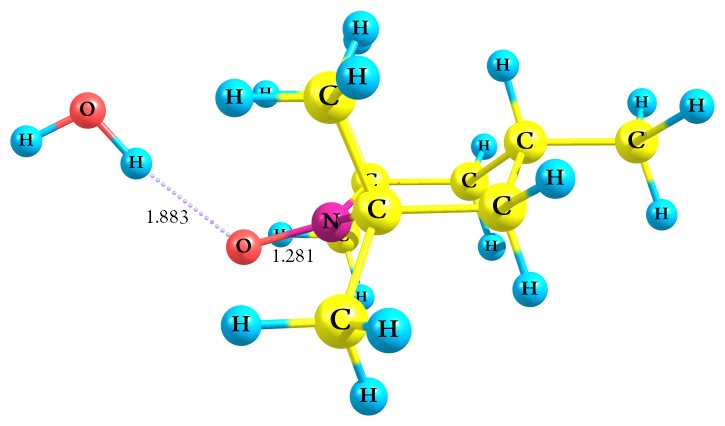 N 0.55360600 0.00004900 0.57843800  C -0.03068900 1.33198800 0.18985600  O 1.78537200 0.00011000 0.93007300  C -0.03057900 -1.33195100 0.18989200  C -1.56855700 1.23958400 0.17011700  C 0.53189200 1.75339100 -1.18432000  C 0.40542200 2.35413800 1.25058800  C 0.40561600 -2.35403400 1.25065200  C 0.53203300 -1.75334900 -1.18427300  C -1.56845400 -1.23967200 0.17015300  C -2.12532500 -0.00007700 -0.53525900  H -1.95152800 2.15281700 -0.29707300  H -1.93538900 1.23964100 1.20421300  H 0.22893900 2.78205800 -1.39847400  H 0.16736500 1.12119600 -1.99517300  H 1.62220000 1.70879400 -1.18138600  H -0.06193200 3.31790900 1.03189400  H 1.48722700 2.48066800 1.25298600  H 0.09356200 2.03668300 2.24842700  H -0.06166000 -3.31784900 1.03198700  H 0.09373400 -2.03657600 2.24848300  H 1.48743200 -2.48047900 1.25305100  H 0.22915100 -2.78204200 -1.39840100  H 1.62233800 -1.70867700 -1.18134400  H 0.16746000 -1.12120000 -1.99514200  H -1.95135200 -2.15295000 -0.29700700  H -1.93528300 -1.23972700 1.20425000  H -1.79128400 -0.00007800 -1.57916300  C -3.65818300 -0.00014000 -0.53866200  H -4.05256000 0.88373200 -1.04844100  H -4.05248700 -0.88405700 -1.04842000  H -4.05329300 -0.00014500 0.48283000  H 3.25154600 -0.00002000 -0.25219100  O 3.89046200 -0.00002400 -0.98540200  H 4.75484900 -0.00000100 -0.56480000  Zero-point correction= 0.311866 (Hartree/Particle)  Thermal correction to Energy= 0.328254  Thermal correction to Enthalpy= 0.329198  Thermal correction to Gibbs Free Energy= 0.269524  Sum of electronic and zero-point Energies= -599.337841  Sum of electronic and thermal Energies= -599.321454  Sum of electronic and thermal Enthalpies= -599.320510  Sum of electronic and thermal Free Energies= -599.380183  **TEMPO-NH2-H2O** [H-atom bonded to the O-atom of the NO moiety in top mode]  0 2  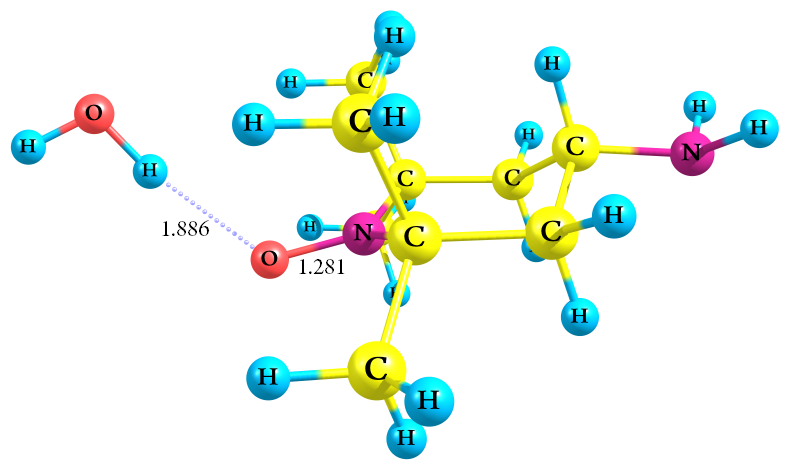 N -0.54276500 -0.00005000 0.57816100  C 0.04298100 -1.33312400 0.19395500  O -1.77510600 -0.00011000 0.92647000  C 0.04286400 1.33308800 0.19399100  C 1.57969400 -1.23744200 0.16881200  C -0.52921700 -1.76423100 -1.17353900  C -0.38359800 -2.34937800 1.26431700  C -0.38380900 2.34928200 1.26437300  C -0.52936600 1.76417500 -1.17349600  C 1.57958400 1.23754000 0.16885300  C 2.12029500 0.00008400 -0.54438100  H 1.96452100 -2.14904700 -0.30161400  H 1.9651 6500 -1.22266200 1.19367500  H -0.21672300 -2.78980200 -1.38881900  H -0.18197700 -1.12933100 -1.98994200  H -1.61983400 -1.73242300 -1.15834700  H 0.08008800 -3.31506300 1.04656200  H -1.46560600 -2.47361300 1.27664800  H -0.06142600 -2.02696100 2.25708700  H 0.07979700 3.31501100 1.04664000  H -0.06161700 2.02687300 2.25713900  H -1.46582700 2.47342400 1.27669600  H -0.21695800 2.78977800 -1.38875300  H -1.61998000 1.73226700 -1.15831300  H -0.18206000 1.12932500 -1.98991100  H 1.96433600 2.14919400 -0.30154100  H 1.96505200 1.22275800 1.19371700  H 1.77033600 0.00008600 -1.58681000  N 3.58844800 0.00014700 -0.46471300  H 3.97452200 -0.81619200 -0.92967900  H 3.97445400 0.81651700 -0.92968300  H -3.24138800 -0.00007500 -0.26028900  O -3.87713400 0.00000800 -0.99607000  H -4.74330700 0.00010400 -0.57909600  Zero-point correction= 0.301285 (Hartree/Particle)  Thermal correction to Energy= 0.317521  Thermal correction to Enthalpy= 0.318466  Thermal correction to Gibbs Free Energy= 0.259130  Sum of electronic and zero-point Energies= -615.390221  Sum of electronic and thermal Energies= -615.373985  Sum of electronic and thermal Enthalpies= -615.373041  Sum of electronic and thermal Free Energies= -615.432376  **TEMPO-CHO-H2O** [H-atom bonded to the O-atom of the NO moiety in top mode]  0 2  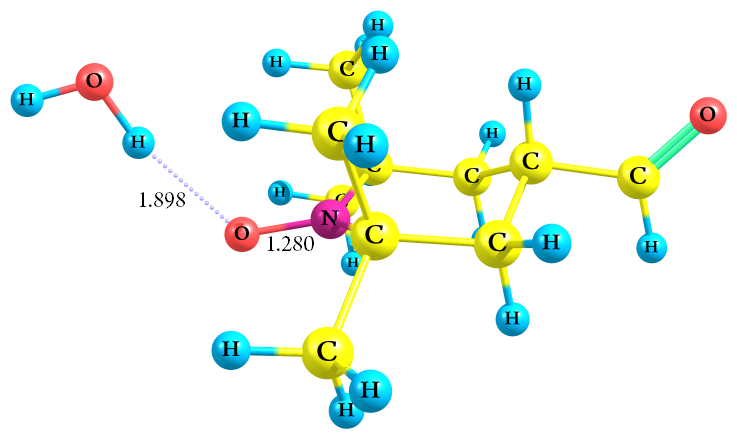 N 0.85224400 0.00005600 -0.59895800  C 0.24103100 -1.33162200 -0.25456800  O 2.10732700 0.00010300 -0.85075500  C 0.24094600 1.33168000 -0.25451600  C -1.29288900 -1.24678900 -0.37980000  C 0.67006400 -1.74489700 1.16893400  C 0.77140500 -2.35943100 -1.26570900  C 0.77124700 2.35956600 -1.26561600  C 0.66996500 1.74492100 1.16900200  C -1.29297000 1.24675700 -0.37974500  C -1.90077800 -0.00005100 0.28099500  H -1.71567300 -2.15777200 0.05417600  H -1.56141700 -1.24570500 -1.44302700  H 0.36300200 -2.77807900 1.35227300  H 0.21709200 -1.12042100 1.94007400  H 1.75422400 -1.68249500 1.27438900  H 0.28311300 -3.32114100 -1.08862700  H 1.84777200 -2.48846500 -1.16306100  H 0.55884100 -2.04495400 -2.29016900  H 0.28288700 3.32123400 -1.08849300  H 0.55870300 2.04511600 -2.29008900  H 1.84760500 2.48866700 -1.16296100  H 0.36286500 2.77808500 1.35238300  H 1.75412800 1.68254900 1.27444700  H 0.21701800 1.12039800 1.94012000  H -1.71580900 2.15769300 0.05427700  H -1.56150200 1.24570600 -1.44297100  H -1.72121700 -0.00006800 1.35852900  C -3.40214900 -0.00009100 0.08694600  H -3.73520500 -0.00010300 -0.97637300  O -4.21457400 -0.00010700 0.97768900  H 3.45360800 -0.00011000 0.48747500  O 3.95806200 -0.00008800 1.31814100  H 4.88250600 -0.00004200 1.05419800  Zero-point correction= 0.293274 (Hartree/Particle)  Thermal correction to Energy= 0.311207  Thermal correction to Enthalpy= 0.312151  Thermal correction to Gibbs Free Energy= 0.246185  Sum of electronic and zero-point Energies= -673.379470  Sum of electronic and thermal Energies= -673.361537  Sum of electronic and thermal Enthalpies= -673.360593  Sum of electronic and thermal Free Energies= -673.426559  **TEMPO-NO2-H2O** [H-atom bonded to the O-atom of the NO moiety in top mode]  0 2  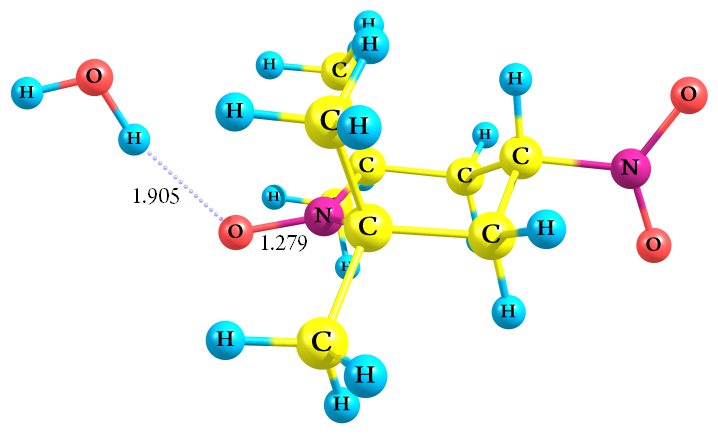 N 1.07049900 0.00904900 -0.60626900  C 0.48050200 -1.32711200 -0.23849700  O 2.31242000 0.01509400 -0.91302800  C 0.47092100 1.33793900 -0.22805100  C -1.05842700 -1.24809800 -0.30053300  C 0.97562600 -1.74550600 1.16204800  C 0.96483300 -2.34950600 -1.27746000  C 0.94730500 2.37199000 -1.25912800  C 0.96429900 1.74847300 1.17539900  C -1.06749600 1.24865000 -0.28974100  C -1.60327300 -0.00461 700 0.39328200  H -1.46637900 -2.15417300 0.15561000  H -1.38542200 -1.22658500 -1.34300400  H 0.67238500 -2.77731600 1.35828700  H 0.56777100 -1.12076300 1.95817500  H 2.06378100 -1.68846200 1.21403600  H 0.48934900 -3.31372300 -1.08114000  H 2.04529000 -2.47374200 -1.22421300  H 0.70312300 -2.03208200 -2.28914800  H 0.46497800 3.33118700 -1.05498600  H 0.68727900 2.06069000 -2.27314900  H 2.02688200 2.50349800 -1.20551800  H 0.65452100 2.77662200 1.38037000  H 2.05289500 1.69816400 1.22532000  H 0.56167200 1.11440300 1.96677600  H -1.48142300 2.14784700 0.17456800  H -1.39497000 1.23407100 -1.33216500  H -1.40943400 -0.00860900 1.46365100  N -3.12702400 -0.00987900 0.30988000  H 3.71558800 -0.00637100 0.37507100  O 4.21803500 -0.02060000 1.20633200  H 5.14362000 -0.01831000 0.94639500  O -3.63127300 -0.00552800 -0.80299000  O -3.74437700 -0.01819300 1.36417100  Zero-point correction= 0.287311 (Hartree/Particle)  Thermal correction to Energy= 0.304808  Thermal correction to Enthalpy= 0.305752  Thermal correction to Gibbs Free Energy= 0.242138  Sum of electronic and zero-point Energies= -764.600735  Sum of electronic and thermal Energies= -764.583238  Sum of electronic and thermal Enthalpies= -764.582294  Sum of electronic and thermal Free Energies= -764.645908  **TEMPO-H2O** [H-atom bonded to the O-atom of the NO moiety in orthogonal mode]  0 2  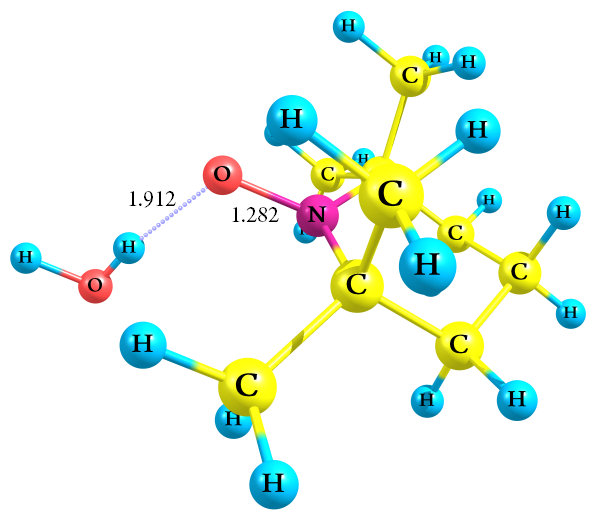 N -0.31723600 0.00018400 0.23934200  C 0.36126800 1.33553300 0.07720900  O -1.39989700 0.00059100 0.92561300  C 0.36031300 -1.33566600 0.07731900  C 1.44457500 1.24494900 -1.01488600  C 0.95850500 1.76071600 1.43470700  C -0.71033100 2.35063500 -0.34778500  C -0.71202000 -2.35001600 -0.34760400  C 0.95721900 -1.76114800 1.43487000  C 1.44371300 -1.24594200 -1.01476700  C 2.32286800 -0.00079800 -0.91070100  H 2.04718900 2.15705900 -0.96550800  H 0.95416400 1.24577800 -1.99502800  H 1.31340500 2.79284000 1.36992000  H 1.80012600 1.13465800 1.73582200  H 0.19223400 1.70730100 2.21002800  H -0.23055700 3.31142700 -0.55310500  H -1.45382300 2.49163400 0.43581200  H -1.22606200 2.01945600 -1.25163800  H -0.23296000 -3.31121400 -0.55269000  H -1.22739200 -2.01862000 -1.25158200  H -1.45572500 -2.49028700 0.43592000  H 1.31136900 -2.79353500 1.37019100  H 0.19097200 -1.70710400 2.21017200  H 1.79929200 -1.13567100 1.73593800  H 2.04568700 -2.15846700 -0.96527900  H 0.95331800 -1.24653900 -1.99491700  H 2.89249200 -0.00095100 0.02432100  H 3.06083900 -0.00109300 -1.71842700  H -3.03208700 0.00063400 -0.07101100  O -3.78427600 0.00031000 -0.68665500  H -4.56510200 0.00461000 -0.12617200  Zero-point correction= 0.284272 (Hartree/Particle)  Thermal correction to Energy= 0.299282  Thermal correction to Enthalpy= 0.300226  Thermal correction to Gibbs Free Energy= 0.242213  Sum of electronic and zero-point Energies= -560.039755  Sum of electronic and thermal Energies= -560.024745  Sum of electronic and thermal Enthalpies= -560.023801  Sum of electronic and thermal Free Energies= -560.081813  **TEMPO-CH3-H2O**[H-atom bonded to the O-atom of the NO moiety in orthogonal mode]  0 2  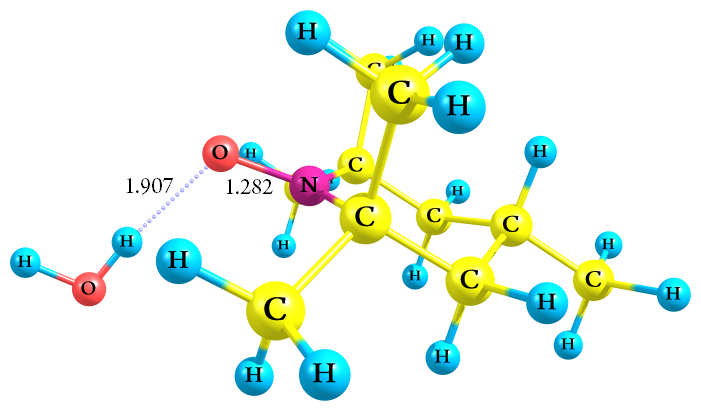 N -0.65883600 -0.00000800 0.26733200  C 0.03841200 1.33379600 0.24717100  O -1.86165200 -0.00001300 0.71060600  C 0.03843400 -1.33380200 0.24716400  C 1.33552100 1.23803300 -0.57831600  C 0.31972700 1.77160600 1.69976400  C -0.91307800 2 .34375500 -0.41248900  C -0.91303100 -2.34377900 -0.41250500  C 0.31975700 -1.77161700 1.69975500  C 1.33554400 -1.23801400 -0.57831900  C 2.18854400 0.00001700 -0.28972500  H 1.91032400 2.15302300 -0.40110400  H 1.07615700 1.23445900 -1.64424900  H 0.68615200 2.80169600 1.70603900  H 1.06893600 1.14509300 2.18651800  H -0.60077900 1.72791600 2.28433600  H -0.40363000 3.30656700 -0.50565200  H -1.81529600 2.48088100 0.18240500  H -1.20908700 2.00929500 -1.40905400  H -0.40355700 -3.30657500 -0.50568700  H -1.20905700 -2.00931100 -1.40906200  H -1.81524000 -2.48094000 0.18239500  H 0.68620700 -2.80169900 1.70602300  H -0.60075200 -1.72795500 2.28432400  H 1.06894900 -1.14508900 2.18651700  H 1.91036300 -2.15299400 -0.40110800  H 1.07618100 -1.23444300 -1.64425200  H 2.47789300 0.00001900 0.76799300  C 3.47432700 0.00003000 -1.12396400  H 4.08286200 0.88408800 -0.91263500  H 4.08287800 -0.88401700 -0.91263700  H 3.24699400 0.00002900 -2.19528600  H -3.26158700 -0.00002100 -0.58454700  O -3.89186100 -0.00000500 -1.32460200  H -4.75989600 0.00002400 -0.91184700  Zero-point correction= 0.311988 (Hartree/Particle)  Thermal correction to Energy= 0.329335  Thermal correction to Enthalpy= 0.330279  Thermal correction to Gibbs Free Energy= 0.266450  Sum of electronic and zero-point Energies= -599.337499  Sum of electronic and thermal Energies= -599.320152  Sum of electronic and thermal Enthalpies= -599.319208  Sum of electronic and thermal Free Energies= -599.383037  **TEMPO-NH2-H2O** [H-atom bonded to the O-atom of the NO moiety in orthogonal mode]  0 2  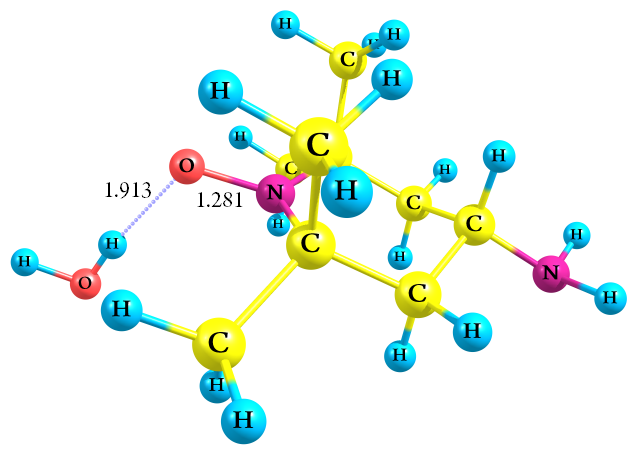 N -0.64411300 -0.00026100 0.26564500  C 0.05240600 1.33443900 0.23695100  O -1.84138900 -0.00058900 0.72205400  C 0.05299500 -1.33463700 0.23667900  C 1.33956800 1.23675100 -0.60170300  C 0.34238000 1.77661300 1.68682800  C -0.90529700 2.34129900 -0.41878300  C -0.90428200 -2.34177300 -0.41925400  C 0.34316900 -1.77698100 1.68646400  C 1.34010900 -1.23621600 -0.60196300  C 2.18687300 0.00042100 -0.30897600  H 1.92093400 2.14958200 -0.43042700  H 1.08527800 1.21940200 -1.66646200  H 0.71462100 2.80466600 1.68775100  H 1.08930200 1.14758100 2.17416600  H -0.57652100 1.74164000 2.27462600  H -0.39817 500 3.30448300 -0.52021900  H -1.80213300 2.47927300 0.18398100  H -1.20899500 2.00241400 -1.41139100  H -0.39675000 -3.30471900 -0.52089900  H -1.20813300 -2.00280200 -1.41178600  H -1.80104900 -2.48025500 0.18350000  H 0.71583300 -2.80488200 1.68717700  H -0.57573700 -1.74250000 2.27428200  H 1.08984000 -1.14774000 2.17391500  H 1.92187100 -2.14883100 -0.43087900  H 1.08580600 -1.21875400 -1.66671900  H 2.47394700 0.00037000 0.75328600  N 3.36260700 0.00077100 -1.19035500  H 3.94174600 0.81772400 -1.02136200  H 3.94201600 -0.81605100 -1.02165000  H -3.27253600 -0.00006700 -0.54703800  O -3.91868400 0.00031900 -1.27292900  H -4.77756700 -0.00143200 -0.84133400  Zero-point correction= 0.301180 (Hartree/Particle)  Thermal correction to Energy= 0.317580  Thermal correction to Enthalpy= 0.318524  Thermal correction to Gibbs Free Energy= 0.257737  Sum of electronic and zero-point Energies= -615.389961  Sum of electronic and thermal Energies= -615.373561  Sum of electronic and thermal Enthalpies= -615.372617  Sum of electronic and thermal Free Energies= -615.433404  **TEMPO-CHO-H2O** [H-atom bonded to the O-atom of the NO moiety in orthogonal mode]  0 2  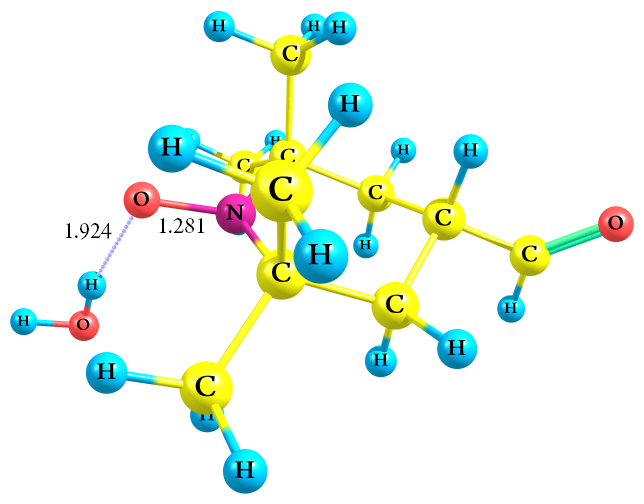 N 0.93903900 0.00002100 0.29489500  C 0.24219700 -1.33325700 0.30648100  O 2.15901800 0.00004600 0.68621300  C 0.24215900 1.33328000 0.30645300  C -1.07592200 -1.24521400 -0.48762100  C -0.00376400 -1.76241900 1.76747400  C 1.17142000 -2.34970000 -0.37487900  C 1.17135900 2.34973900 -0.37491800  C -0.00382300 1.76245600 1.76743800  C -1.07595500 1.24518400 -0.48765100  C -1.91468100 -0.00002200 -0.16382400  H -1.64646400 -2.15745000 -0.28957800  H -0.84325200 -1.24188600 -1.55897500  H -0.36572000 -2.79364 800 1.78934400  H -0.74260700 -1.13652200 2.27007100  H 0.93133100 -1.71199800 2.32754500  H 0.65338200 -3.30878300 -0.45703700  H 2.08337500 -2.49371300 0.20302200  H 1.45178700 -2.01594100 -1.37603500  H 0.65330400 3.30881200 -0.45707500  H 1.45172200 2.01598100 -1.37607600  H 2.08331800 2.49376900 0.20297400  H -0.36579800 2.79367800 1.78929000  H 0.93126700 1.71205800 2.32751900  H -0.74266000 1.13655100 2.27003500  H -1.64652000 2.15740900 -0.28963100  H -0.84328200 1.24183600 -1.55900500  H -2.23290600 -0.00001200 0.88138300  C -3.17462600 -0.00004600 -1.00319900  H -3.00277100 -0.00006200 -2.10382700  O -4.29718000 -0.00003500 -0.56316700  H 3.41721000 -0.00001100 -0.76968700  O 3.87786500 -0.00003900 -1.62496200  H 4.81419700 0.00001300 -1.40770400  Zero-point correction= 0.293220 (Hartree/Particle)  Thermal correction to Energy= 0.311253  Thermal correction to Enthalpy= 0.312197  Thermal correction to Gibbs Free Energy= 0.245690  Sum of electronic and zero-point Energies= -673.379457  Sum of electronic and thermal Energies= -673.361424  Sum of electronic and thermal Enthalpies= -673.360480  Sum of electronic and thermal Free Energies= -673.426987  **TEMPO-NO2-H2O** [H-atom bonded to the O-atom of the NO moiety in orthogonal mode]  0 2  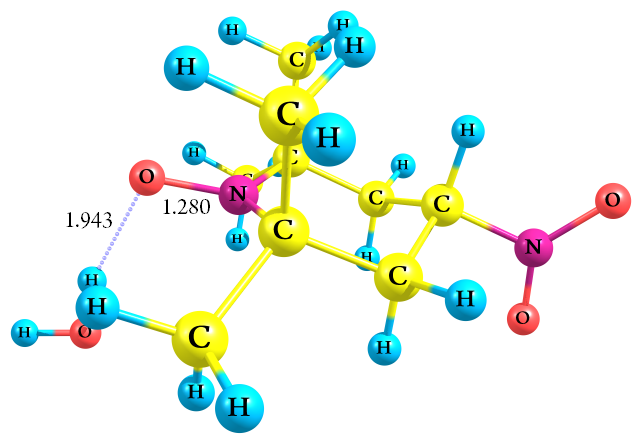 N 1.18833800 0.00004300 -0.32374100  C 0.49494600 1.33438600 -0.39739400  O 2.43856000 0.00003300 -0.59963200  C 0.49505800 -1.33433100 -0.39744200  C -0.88318300 1.24698700 0.28833700  C 0.37321800 1.76193600 -1.87464900  C 1.36057500 2.35260900 0.36056400  C 1.36084200 -2.35240500 0.36052500  C 0.37344200 -1.76187600 -1.8747 1000  C -0.88308600 -1.24706300 0.28828500  C -1.65638800 -0.00005800 -0.12350100  H -1.44641600 2.15069100 0.03988200  H -0.75465900 1.22628100 1.37312700  H 0.00905100 2.79104300 -1.92909200  H -0.31395100 1.13230000 -2.44275500  H 1.35387300 1.71745700 -2.35103700  H 0.83233300 3.30845500 0.40587000  H 2.31313900 2.50374200 -0.14547900  H 1.56360000 2.01430600 1.37840900  H 0.83285600 -3.30840000 0.40560700  H 1.56358900 -2.01417700 1.37845000  H 2.31354700 -2.50320600 -0.14536400  H 0.00940300 -2.79102700 -1.92917400  H 1.35410900 -1.71727700 -2.35106500  H -0.31378000 -1.13232100 -2.44283800  H -1.44623900 -2.15080300 0.03978300  H -0.75457600 -1.22639700 1.37307900  H -1.91142800 -0.00004300 -1.18102200  N -3.01790300 -0.00011500 0.56583400  H 3.48515300 0.00000200 1.03701000  O 3.74999700 0.00000800 1.97099500  H 4.71120600 -0.00018300 1.96417600  O -3.03250800 -0.00009900 1.78697300  O -4.00684900 -0.00007200 -0.15237500  Zero-point correction= 0.287446 (Hartree/Particle)  Thermal correction to Energy= 0.305869  Thermal correction to Enthalpy= 0.306813  Thermal correction to Gibbs Free Energy= 0.239692  Sum of electronic and zero-point Energies= -764.600099  Sum of electronic and thermal Energies= -764.581676  Sum of electronic and thermal Enthalpies= -764.580731  Sum of electronic and thermal Free Energies= -764.647853 |
| --- |

**Table S2.** Summary of important second-order delocalization energies (*E*2) for the orbital interactions of TEMPO derivatives, determined using NBO analysis at the B3LYP/6-311++G(d,p) level of theory.

| Donor  NBO(*i*) | ED(*i*) (a.u.), X=H | Acceptor  NBO(*j*) | ED(*j*) (a.u.), X=H | Interaction type | *E*2 (kcal/mol) | | | | |
| --- | --- | --- | --- | --- | --- | --- | --- | --- | --- |
| −H | −CH3 | −NH2 | −CHO | −NO2 |
| *σ*N1−C2 | 0.99034 | *σ**N1−C4 | 0.03911 | *σ* N1−C2→ *σ**N1−C4 | 0.26 | 0.26 | 0.26 | 0.27 | 0.27 |
|  |  | *σ**C4−C8 | 0.00885 | *σ* N1−C2→ *σ**C4−C8 | 0.34 | 0.35 | 0.40 | 0.35 | 0.35 |
|  |  | *σ**C5−H12 | 0.00616 | *σ* N1−C2→ *σ**C5−H12 | 0.66 | 0.68 | 0.63 | 0.66 | 0.61 |
|  |  | *σ**C6−H14 | 0.00296 | *σ* N1−C2→ *σ**C6−H14 | 0.60 | 0.68 | 0.64 | 0.67 | 0.66 |
| *σ*N1−O3 | 0.99616 | *σ**N1−C2 | 0.03911 | *σ*N1−O3→ *σ**N1−C2 | 0.30 | 0.30 | 0.30 | 0.31 | 0.31 |
|  |  | *σ**C2−C5 | 0.01529 | *σ*N1−O3 → *σ**C2−C5 | 0.42 | 0.43 | 0.44 | 0.43 | 0.43 |
| πN1−O3 | 0.98799 | *σ**C2−C5 | 0.01529 | πN1−O3 → *σ**C2−C5 | 0.28 | 0.28 | 0.27 | 0.32 | 0.32 |
|  |  | *σ**C2−C6 | 0.01155 | πN1−O3 → *σ**C2−C6 | 1.20 | 1.21 | 1.19 | 1.24 | 1.23 |
|  |  | *σ**C2−C7 | 0.00885 | πN1−O3 → *σ**C2−C7 | 0.30 | 0.31 | 0.32 | 0.30 | 0.31 |
|  |  | *σ**C6−H14 | 0.00296 | πN1−O3 → *σ**C6−H14 | 0.27 | 0.27 | 0.27 | 0.26 | 0.26 |
| *σ*C2−C5 | 0.98525 | *σ**N1−O3 | 0.00772 | *σ*C2−C5 → *σ**N1−O3 | 1.47 | 1.47 | 1.55 | 1.44 | 1.42 |
|  |  | *σ**C2−C6 | 0.01155 | *σ*C2−C5 → *σ**C2−C6 | 0.40 | 0.42 | 0.38 | 0.39 | 0.37 |
|  |  | *σ**C5−C11 | 0.00682 | *σ*C2−C5 → *σ**C5−C11 | 0.48 | 0.55 | 0.48 | 0.57 | 0.56 |
|  |  | *σ**C6−H16 | 0.00298 | *σ*C2−C5 → *σ**C6−H16 | 0.69 | 0.68 | 0.66 | 0.67 | 0.66 |
| *σ*C2−C6 | 0.98018 | π*N1−O3 | 0.00772 | *σ*C2−C6 → π*N1−O3 | 1.65 | 1.67 | 1.65 | 1.66 | 1.62 |
|  |  | *σ**C2−C5 | 0.01529 | *σ*C2−C6 → *σ**C2−C5 | 0.43 | 0.46 | 0.42 | 0.45 | 0.41 |
|  |  | *σ**C2−C7 | 0.00885 | *σ*C2−C6 → *σ**C2−C7 | 0.41 | 0.41 | 0.36 | 0.43 | 0.45 |
|  |  | *σ**C5−H13 | 0.00803 | *σ*C2−C6 → *σ**C5−H13 | 0.90 | 0.95 | 0.93 | 0.95 | 0.92 |
|  |  | *σ**C7−H19 | 0.00283 | *σ*C2−C6 → *σ**C7−H19 | 0.87 | 0.87 | 0.88 | 0.86 | 0.85 |
| *σ*C2−C7 | 0.98456 | π*N1−O3 | 0.00772 | *σ*C2−C7 → π*N1−O3 | 0.34 | 0.35 | 0.25 | 0.33 | 0.34 |
|  |  | *σ**N1−C4 | 0.03911 | *σ*C2−C7 → *σ**N1−C4 | 1.45 | 1.45 | 1.52 | 1.47 | 1.46 |
|  |  | *σ**C2−C5 | 0.01529 | *σ*C2−C7 → *σ**C2−C5 | 0.52 | 0.56 | 0.57 | 0.55 | 0.56 |
|  |  | *σ**C2−C6 | 0.01155 | *σ*C2−C7 → *σ**C2−C6 | 0.46 | 0.46 | 0.39 | 0.47 | 0.49 |
|  |  | *σ**C5−C11 | 0.00682 | *σ*C2−C7 → *σ**C5−C11 | 1.11 | 1.10 | 1.05 | 1.14 | 1.19 |
|  |  | *σ**C6−H15 | 0.00346 | *σ*C2−C7 → *σ**C6−H15 | 0.93 | 0.93 | 0.92 | 0.92 | 0.94 |
| *σ*C5−C11 | 0.99057 | *σ**C2−C5 | 0.01529 | *σ*C5−C11 → *σ**C2−C5 | 0.47 | 0.50 | 0.48 | 0.41 | 0.48 |
|  |  | *σ**C2−C7 | 0.00885 | *σ*C5−C11 → *σ**C2−C7 | 1.09 | 1.00 | 1.01 | 1.00 | 0.99 |
|  |  | *σ**C10−H26 | 0.00616 | *σ*C5−C11 → *σ**C10−H26 | 0.99 | 1.06 | 1.04 | 0.98 | 0.89 |
| *σ*C5−H12 | 0.98848 | *σ**N1−C2 | 0.03911 | *σ*C5−C12 → *σ**N1−C2 | 2.19 | 2.20 | 2.30 | 2.15 | 2.14 |
|  |  | *σ**C10−C11 | 0.00682 | *σ*C5−C12 → *σ**C10−C11 | 1.34 | 1.41 | 1.35 | 1.35 | 1.50 |
| *σ*C6−H14 | 0.99082 | *σ**N1−C2 | 0.03911 | *σ*C6−C14 → *σ**N1−C2 | 2.31 | 2.30 | 2.22 | 2.34 | 2.35 |
| *σ*C6−H15 | 0.99382 | *σ**N1−C2 | 0.03911 | *σ*C6−C15 → *σ**N1−C2 | 0.29 | 0.29 | 0.34 | 0.29 | 0.29 |
|  |  | *σ**C2−C5 | 0.01529 | *σ*C6−C15→ *σ**C2−C5 | 1.82 | 1.85 | 1.87 | 1.89 | 1.90 |
|  |  | *σ**C2−C7 | 0.00885 | *σ*C6−C15 → *σ**C2−C7 | 1.62 | 1.61 | 1.62 | 1.62 | 1.60 |
| *σ*C11−H28 | 0.98935 | *σ**C5−H13 | 0.00803 | *σ*C11−H28 → *σ**C5−H13 | 1.34 | 1.52 | 1.39 | 1.34 | 1.31 |
| LP(1)O3 | 0.99118 | *σ**N1−C2 | 0.03911 | LP(1)O3 → *σ**N1−C2 | 1.63 | 1.63 | 1.64 | 1.64 | 1.66 |
| LP(2)O3 | 0.96106 | *σ**N1−C2 | 0.03911 | LP(2)O3 → *σ**N1−C2 | 4.94 | 4.93 | 4.95 | 4.96 | 4.99 |
|  |  | *σ**C2−C5 | 0.01529 | LP(2)O3 → *σ**C2−C5 | 0.57 | 0.57 | 0.57 | 0.58 | 0.59 |

**Table S3.** Summary of important second-order delocalization energies (*E*2) for the orbital interactions of protonated TEMPO derivatives (O-protonation), determined using NBO analysis at the B3LYP/6-311++G(d,p) level of theory.

| Donor  NBO (*i*) | ED(*i*) (a.u.), X=H | Acceptor  NBO(*j*) | ED(*j*) (a.u.), X=H | Interaction type | *E*2 (kcal/mol) | | | | |
| --- | --- | --- | --- | --- | --- | --- | --- | --- | --- |
| −H | −CH3 | −NH2 | −CHO | −NO2 |
| *σ*N1−C2 | 0.99147 | *σ**N1−C4 | 0.03421 | *σ* N1−C2→ *σ**N1−C4 | 0.41 | 0.41 | 0.42 | 0.41 | 0.39 |
|  |  | *σ**C4−C8 | 0.00847 | *σ* N1−C2→ *σ**C4−C8 | 0.26 | 0.30 | 0.26 | 0.30 | 0.30 |
|  |  | *σ**C5−H12 | 0.00547 | *σ* N1−C2→ *σ**C5−H12 | 0.55 | 0.57 | 0.58 | 0.55 | 0.52 |
|  |  | *σ**C6−H14 | 0.00236 | *σ* N1−C2→ *σ**C6−H14 | 0.50 | 0.49 | 0.49 | 0.49 | 0.48 |
| *σ*N1−O3 | 0.99688 | *σ**C2−C5 | 0.01468 | *σ*N1−O3 → *σ**C2−C5 | 0.34 | 0.35 | 0.35 | 0.35 | 0.34 |
| πN1−O3 | 0.99498 | *σ**C2−C6 | 0.00996 | πN1−O3 → *σ**C2−C6 | 0.43 | 0.42 | 0.42 | 0.42 | 0.42 |
| *σ*C2−C5 | 0.97992 | *σ**N1−O3 | 0.01509 | *σ*C2−C5 → *σ**N1−O3 | 1.94 | 1.79 | 1.96 | 1.74 | 1.69 |
|  |  | π*N1−O3 | 0.10008 | *σ*C2−C5 → π*N1−O3 | 0.28 | 0.35 | <0.25 | 0.38 | 0.38 |
|  |  | *σ**C2−C6 | 0.00996 | *σ*C2−C5 → *σ**C2−C6 | 0.53 | 0.53 | 0.57 | 0.50 | 0.49 |
|  |  | *σ**C5−C11 | 0.00616 | *σ*C2−C5 → *σ**C5−C11 | 0.41 | 0.48 | 0.40 | 0.51 | 0.51 |
|  |  | *σ**C6−H16 | 0.00254 | *σ*C2−C5 → *σ**C6−H16 | 0.69 | 0.66 | 0.68 | 0.64 | 0.62 |
|  |  | *σ**C7−H18 | 0.00325 | *σ*C2−C5 → *σ**C7−H18 | 0.84 | 0.70 | 0.82 | 0.69 | 0.69 |
| *σ*C2−C6 | 0.96225 | π*N1−O3 | 0.10008 | *σ*C2−C6 → π*N1−O3 | 3.50 | 3.39 | 3.53 | 3.36 | 3.27 |
|  |  | *σ**N1−C4 | 0.03421 | *σ*C2−C6 → *σ**N1−C4 | 0.51 | 0.58 | 0.52 | 0.57 | 0.57 |
|  |  | *σ**C2−C5 | 0.01468 | *σ*C2−C6 → *σ**C2−C5 | 0.55 | 0.53 | 0.57 | 0.51 | 0.47 |
|  |  | *σ**C2−C7 | 0.00934 | *σ*C2−C6 →*σ**C2−C7 | 0.37 | 0.42 | 0.38 | 0.44 | 0.46 |
|  |  | *σ**C5−H13 | 0.00724 | *σ*C2−C6 →*σ**C5−H13 | 0.77 | 0.82 | 0.81 | 0.83 | 0.79 |
|  |  | *σ**C7−H19 | 0.00262 | *σ*C2−C6 →*σ**C7−H19 | 0.81 | 0.79 | 0.80 | 0.78 | 0.77 |
| *σ*C2−C7 | 0.98134 | π*N1−O3 | 0.10008 | *σ*C2−C7 → π*N1−O3 | 0.53 | 0.85 | 0.58 | 0.80 | 0.80 |
|  |  | *σ**N1−C4 | 0.03421 | *σ*C2−C7 → *σ**N1−C4 | 1.54 | 1.64 | 1.54 | 1.65 | 1.64 |
|  |  | *σ**C2−C5 | 0.01468 | *σ*C2−C7 → *σ**C2−C5 | 0.59 | 0.63 | 0.65 | 0.62 | 0.64 |
|  |  | *σ**C2−C6 | 0.00996 | *σ*C2−C7 → *σ**C2−C6 | 0.48 | 0.52 | 0.48 | 0.53 | 0.54 |
|  |  | *σ**C5−C11 | 0.00616 | *σ*C2−C7 → *σ**C5−C11 | 0.91 | 0.97 | 0.91 | 0.99 | 1.07 |
|  |  | *σ**C6−H15 | 0.00306 | *σ*C2−C7 → *σ**C6−H15 | 0.79 | 0.82 | 0.79 | 0.81 | 0.83 |
| *σ*C5−C11 | 0.99033 | *σ**C2−C5 | 0.01468 | *σ*C5−C11 → *σ**C2−C5 | 0.40 | 0.41 | 0.39 | 0.34 | 0.40 |
|  |  | *σ**C2−C7 | 0.00934 | *σ*C5−C11 → *σ**C2−C7 | 1.23 | 1.03 | 1.14 | 1.03 | 1.01 |
|  |  | *σ**C10−C11 | 0.00616 | *σ*C5−C11 → *σ**C10−C11 | 0.32 | 0.37 | 0.46 | 0.42 | 0.53 |
|  |  | *σ**C10−H26 | 0.00533 | *σ*C5−C11 → *σ**C10−H26 | 0.90 | 1.01 | 0.97 | 0.93 | 0.81 |
| *σ*C5−H12 | 0.98609 | *σ**N1−C2 | 0.03710 | *σ*C5−C12 → *σ**N1−C2 | 2.45 | 2.44 | 2.48 | 2.41 | 2.41 |
|  |  | *σ**C10−C11 | 0.00616 | *σ*C5−C12 → *σ**C10−C11 | 1.33 | 1.45 | 1.30 | 1.41 | 1.54 |
| *σ*C5−C13 | 0.98846 | *σ**C2−C6 | 0.00996 | *σ*C5−C13 → *σ**C2−C6 | 1.97 | 1.95 | 2.01 | 1.90 | 1.90 |
| *σ*C6−H14 | 0.98353 | *σ**N1−C2 | 0.03710 | *σ*C6−C14 → *σ**N1−C2 | 2.72 | 2.66 | 2.71 | 2.70 | 2.72 |
|  |  | π*N1−O3 | 0.10008 | *σ*C6−C14 → π*N1−O3 | 0.49 | 0.50 | 0.48 | 0.51 | 0.51 |
| *σ*C6−H15 | 0.99329 | *σ**C2−C5 | 0.01468 | *σ*C6−C15 → *σ**C2−C5 | 1.74 | 1.81 | 1.76 | 1.84 | 1.86 |
|  |  | *σ**C2−C7 | 0.00934 | *σ*C6−C15 → *σ**C2−C7 | 1.73 | 1.65 | 1.72 | 1.66 | 1.64 |
| *σ*C11−H28 | 0.98931 | *σ**C5−H13 | 0.00724 | *σ*C11−H28 → *σ**C5−H13 | 1.32 | 1.48 | 1.33 | 1.34 | 1.24 |
| LP(1)O3 | 0.99033 | *σ**N1−C2 | 0.03710 | LP(1)O3 → *σ**N1−C2 | 2.99 | 2.98 | 3.00 | 3.01 | 3.05 |
|  |  | *σ**C2−C5 | 0.01468 | LP(1)O3 → *σ**C2−C5 | 0.28 | 0.29 | 0.29 | 0.29 | 0.29 |

**Table S4.** Summary of important second-order delocalization energies (*E*2) for the orbital interactions of protonated TEMPO derivatives (N-protonation), determined using NBO analysis at the B3LYP/6-311++G(d,p) level of theory.

| Donor  NBO (*i*) | ED(*i*) (a.u.), X=H | Acceptor  NBO(*j*) | ED(*j*) (a.u.), X=H | Interaction type | *E*2 (kcal/mol) | | | | |
| --- | --- | --- | --- | --- | --- | --- | --- | --- | --- |
| −H | −CH3 | −NH2 | −CHO | −NO2 |
| *σ*N1−C2 | 0.99204 | *σ**N1−O3 | 0.00507 | *σ* N1−C2→ *σ**N1−O3 | 0.33 | 0.35 | 0.35 | 0.31 | 0.32 |
|  |  | *σ**C5−H12 | 0.00493 | *σ* N1−C2→ *σ**C5−H12 | 0.65 | 0.67 | 0.68 | 0.65 | 0.61 |
|  |  | *σ**C6−H14 | 0.00233 | *σ* N1−C2→ *σ**C6−H14 | 0.58 | 0.57 | 0.57 | 0.56 | 0.56 |
| *σ*N1−O3 | 0.99696 | *σ**C2−C5 | 0.01599 | *σ*N1−O3 → *σ**N1−C2 | 0.26 | 0.26 | 0.26 | 0.27 | 0.26 |
|  |  | *σ**N1−O3 | 0.00507 | *σ*N1−O3 → *σ**N1−O3 | 0.35 | 0.36 | 0.36 | 0.33 | 0.35 |
|  |  | *σ**C2−C5 | 0.01599 | *σ*N1−O3 → *σ**C2−C5 | 0.26 | 0.28 | 0.28 | 0.27 | 0.27 |
| πN1−O3 | 0.96862 | *σ**C2−C6 | 0.01131 | πN1−O3 → *σ**C2−C5 | 0.48 | 0.46 | 0.46 | 0.50 | 0.57 |
|  |  | *σ**C2−C7 | 0.00922 | πN1−O3 → *σ**C2−C7 | 1.05 | 1.05 | 1.05 | 1.04 | 1.06 |
| *σ*N1−H29 | 0.99146 | π*N1−O3 | 0.03001 | *σ*N1−H29 → π*N1−O3 | 0.50 | 0.53 | 0.54 | 0.48 | 0.48 |
|  |  | *σ**C2−C6 | 0.01131 | *σ*N1−H29 → *σ**C2−C6 | 0.98 | 0.99 | 0.99 | 0.98 | 0.98 |
| *σ*C2−C5 | 0.98367 | *σ**N1−O3 | 0.00507 | *σ*C2−C5 → *σ**N1−O3 | 1.50 | 1.51 | 1.50 | 1.47 | 1.37 |
|  |  | *σ**C2−C6 | 0.01131 | *σ*C2−C5 → *σ**C2−C6 | 0.51 | 0.53 | 0.53 | 0.52 | 0.47 |
|  |  | *σ**C5−C11 | 0.00696 | *σ*C2−C5 → *σ**C5−C11 | 0.38 | 0.46 | 0.40 | 0.49 | 0.47 |
|  |  | *σ**C6−H16 | 0.00272 | *σ*C2−C5 → *σ**C6−H16 | 0.68 | 0.67 | 0.66 | 0.66 | 0.65 |
| *σ*C2−C6 | 0.98663 | *σ**N1−H30 | 0.02648 | *σ*C2−C6 → *σ**N1−H30 | 1.31 | 1.30 | 1.29 | 1.31 | 1.31 |
|  |  | *σ**C2−C5 | 0.01599 | *σ*C2−C6 → *σ**C2−C5 | 0.56 | 0.60 | 0.58 | 0.59 | 0.54 |
|  |  | *σ**C2−C7 | 0.00922 | *σ*C2−C6 → *σ**C2−C7 | 0.50 | 0.49 | 0.50 | 0.51 | 0.54 |
|  |  | *σ**C5−H13 | 0.00725 | *σ*C2−C6 → *σ**C5−H13 | 0.83 | 0.88 | 0.86 | 0.85 | 0.86 |
|  |  | *σ**C7−H19 | 0.00278 | *σ*C2−C6 → *σ**C7−H19 | 0.78 | 0.78 | 0.78 | 0.76 | 0.76 |
| *σ*C2−C7 | 0.97279 | π*N1−O3 | 0.03001 | *σ*C2−C7 → π*N1−O3 | 2.58 | 2.61 | 2.58 | 2.61 | 2.50 |
|  |  | *σ**C2−C6 | 0.01131 | *σ*C2−C7 → *σ**C2−C6 | 0.52 | 0.51 | 0.51 | 0.52 | 0.55 |
|  |  | *σ**C5−C11 | 0.00696 | *σ*C2−C7 → *σ**C5−C11 | 1.27 | 1.29 | 1.27 | 1.33 | 1.40 |
|  |  | *σ**C6−H15 | 0.00313 | *σ*C2−C7 → *σ**C6−H15 | 0.90 | 0.90 | 0.91 | 0.90 | 0.90 |
| *σ*C5−C11 | 0.99034 | *σ**C2−C5 | 0.01599 | *σ*C5−C11 → *σ**C2−C5 | 0.45 | 0.49 | 0.46 | 0.47 | 0.46 |
|  |  | *σ**C2−C7 | 0.00922 | *σ*C5−C11 → *σ**C2−C7 | 0.96 | 0.88 | 0.89 | 0.88 | 0.84 |
|  |  | *σ**C10−H26 | 0.00511 | *σ*C5−C11 → *σ**C10−H26 | 0.61 | 0.71 | 0.66 | 0.64 | 0.61 |
| *σ*C5−H12 | 0.98385 | *σ**N1−C2 | 0.04401 | *σ*C5−C12 → *σ**N1−C2 | 2.54 | 2.59 | 2.58 | 2.54 | 2.48 |
|  |  | *σ**C10−C11 | 0.00767 | *σ*C5−C12 → *σ**C10−C11 | 1.75 | 1.78 | 1.69 | 1.93 | 1.77 |
| *σ*C5−C13 | 0.98844 | *σ**C2−C6 | 0.01131 | *σ*C5−C13 → *σ**C2−C6 | 2.06 | 2.07 | 2.08 | 2.07 | 1.95 |
|  |  | *σ**C11−H28 | 0.00730 | *σ*C5−C13 → *σ**C11−H28 | 1.43 | 1.51 | 1.44 | 1.63 | 1.55 |
| *σ*C6−H15 | 0.99261 | *σ**N1−C2 | 0.04401 | *σ*C6−C15 → *σ**N1−C2 | 2.86 | 2.88 | 2.87 | 2.87 | 2.85 |
|  |  | *σ**C2−C5 | 0.01599 | *σ*C6−C15→ *σ**C2−C5 | 2.09 | 2.12 | 2.13 | 2.13 | 2.15 |
|  |  | *σ**C2−C7 | 0.00922 | *σ*C6−C15 → *σ**C2−C7 | 1.78 | 1.78 | 1.76 | 1.78 | 1.77 |
| *σ*C11−H28 | 0.98958 | *σ**C5−H13 | 0.00725 | *σ*C11−H28 → *σ**C5−H13 | 1.29 | 1.42 | 1.30 | 1.28 | 1.24 |
| LP(1)O3 | 0.99276 | *σ**N1−C2 | 0.04401 | LP(1)O3 → *σ**N1−C2 | 1.43 | 1.42 | 1.41 | 1.44 | 1.44 |
|  |  | *σ**N1−H30 | 0.02648 | LP(1)O3 → *σ**N1−H30 | 0.46 | 0.45 | 0.45 | 0.46 | 0.45 |
| LP(2)O3 | 0.95768 | *σ**N1−C2 | 0.04401 | LP(2)O3 → *σ**N1−C2 | 5.62 | 5.54 | 5.59 | 5.69 | 5.74 |
|  |  | *σ**N1−H30 | 0.02648 | LP(2)O3 → *σ**N1−H30 | 6.73 | 6.64 | 6.61 | 6.84 | 6.77 |
|  |  | *σ**C2−C5 | 0.01599 | LP(2)O3 → *σ**C2−C5 | 0.26 | 0.27 | 0.27 | 0.25 | 0.26 |

| Optimized structure | X=H | X=CH3 | X=NH2 | X=CHO | X=NO2 |
| --- | --- | --- | --- | --- | --- |
| HOMO orbitals | **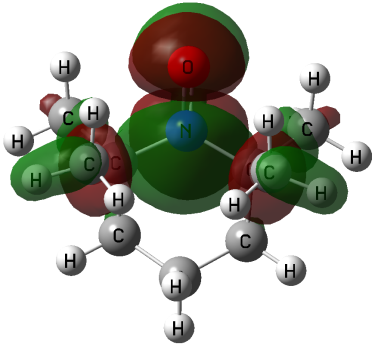**  *E* = −5.323 eV | **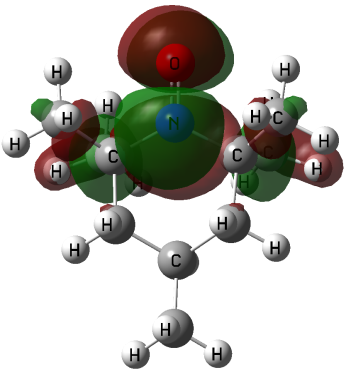**  *E* = −5.322 eV | **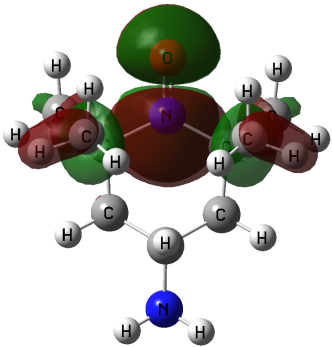**  *E* = −5.360 eV | **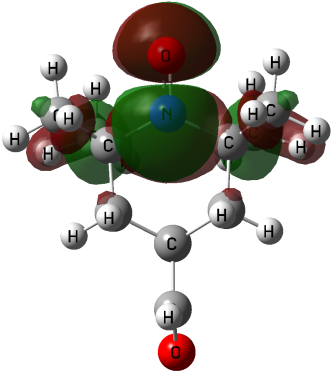**  *E* = −5.634 eV | **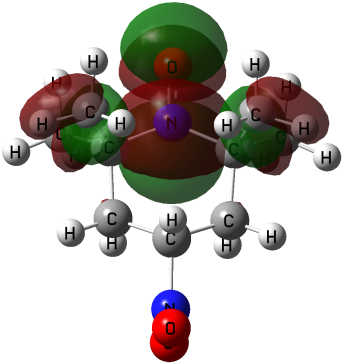**  *E* = −5.843 eV |
| LUMO orbitals | **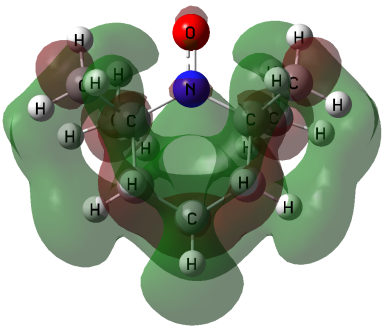**  *E* = −0.375 eV | **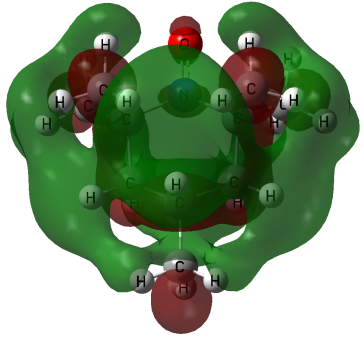**  *E* = −0.375 eV | **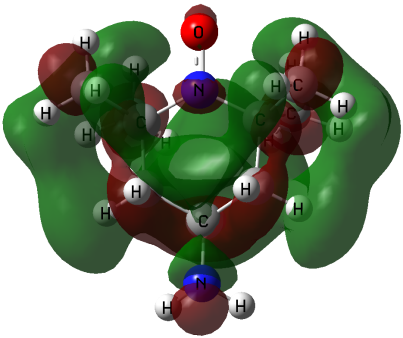**  *E* = −0.496 eV | **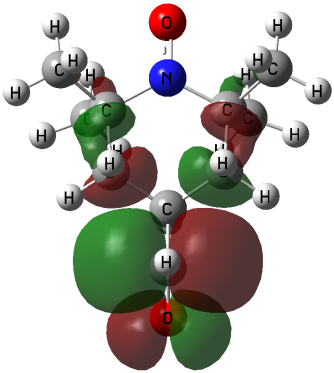**  *E* = −1.341 eV | **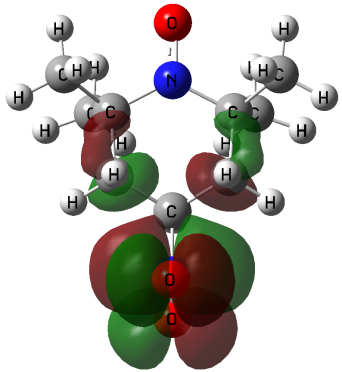**  *E* = −2.430 eV |
| MEP  maps | 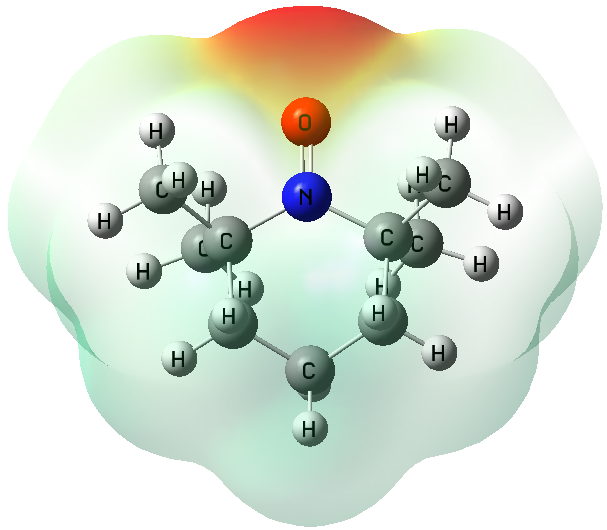 | 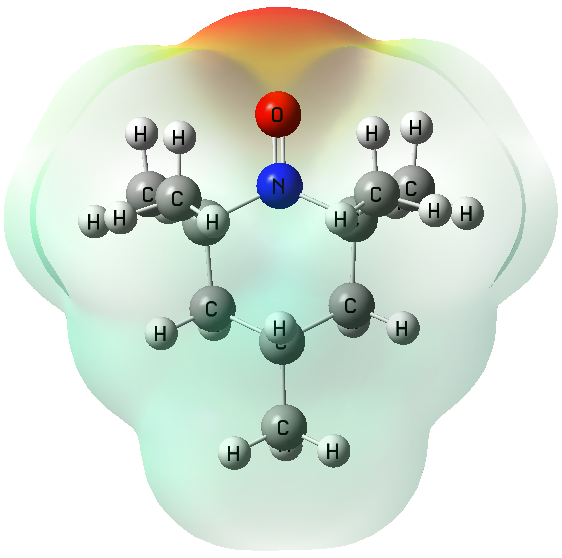 | 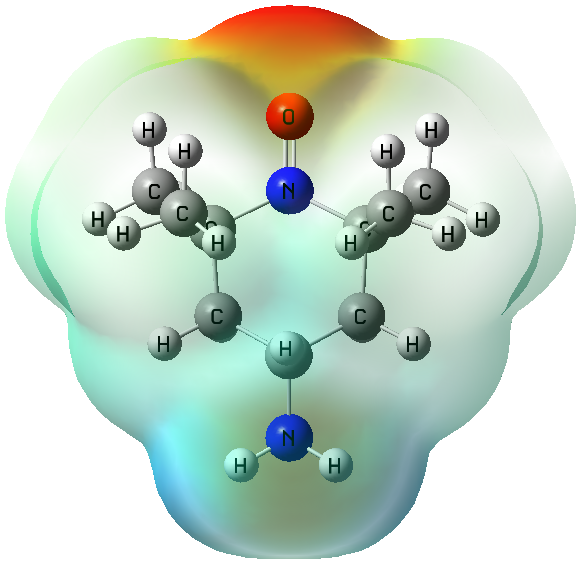 | 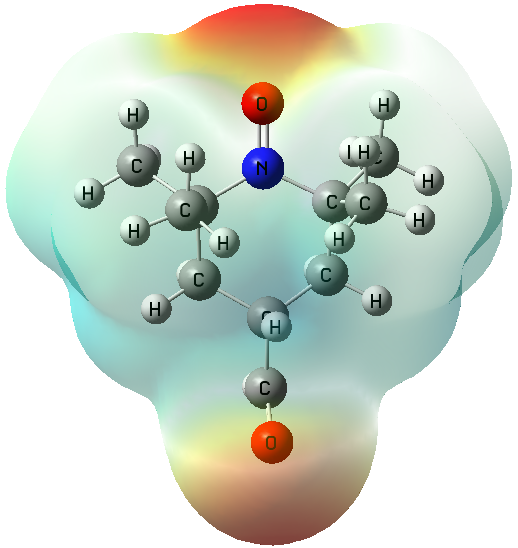 | 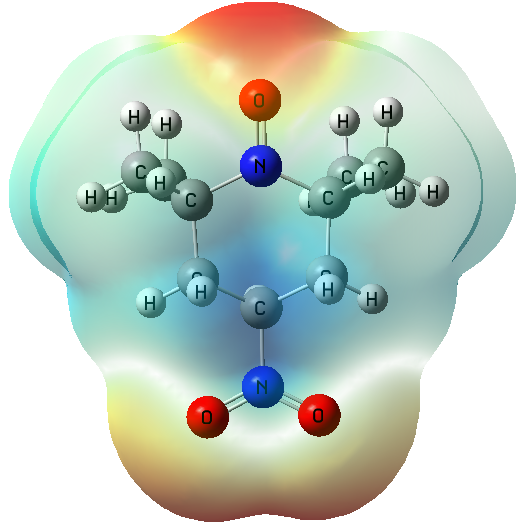 |

**Figure S1.** The representative molecular structures of the HOMO and LUMO orbitals and the total electron density mapped with the electrostatic potential surface of the considered TEMPO derivatives calculated at the B3LYP/6-311++G(d,p) level of theory.

| Optimized structure | X=H | X=CH3 | X=NH2 | X=CHO | X=NO2 |
| --- | --- | --- | --- | --- | --- |
| HOMO orbitals | **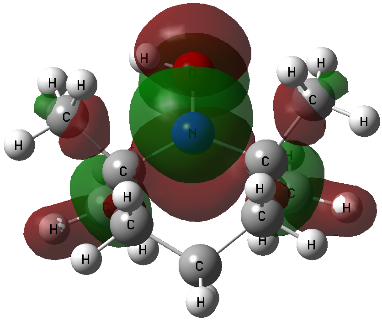**  *E* = −11.917eV | **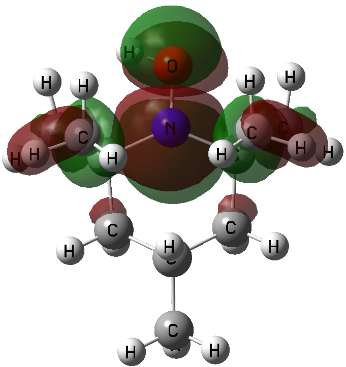**  *E* = −11.870 eV | **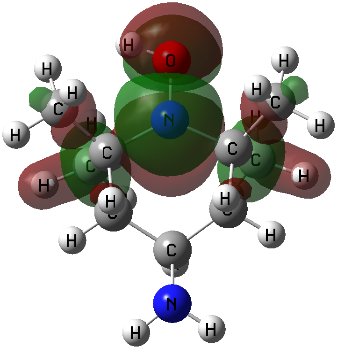**  *E* = −10.204 eV | **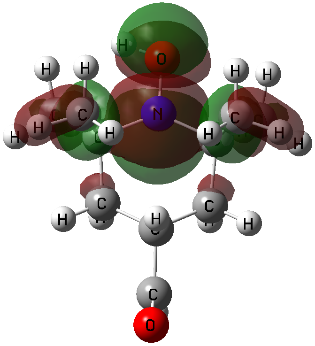**  *E* = −10.523 eV | **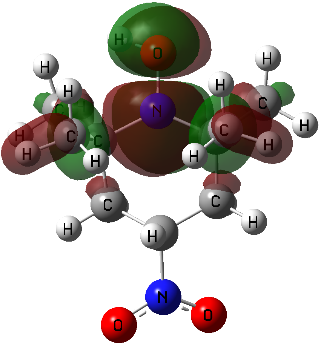**  *E* = −11.702 eV |
| LUMO orbitals | **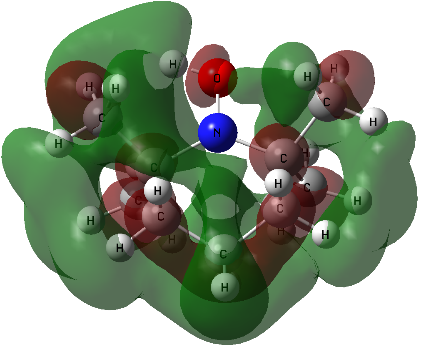**  *E* = −4.190 eV | **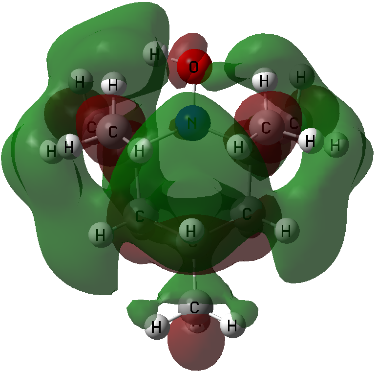**  *E* = −4.161 eV | **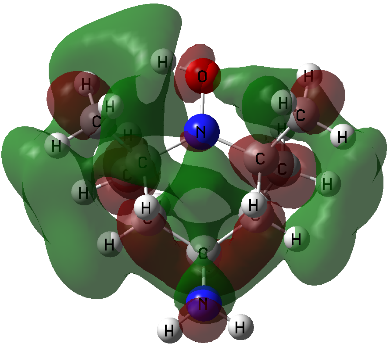**  *E* = −4.191eV | **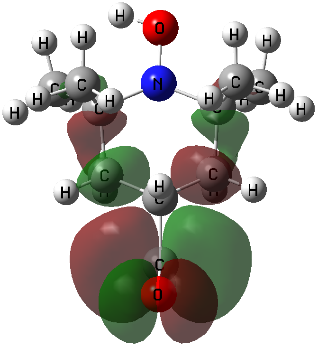**  *E* = −4.522 eV | **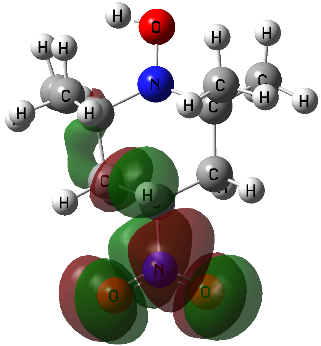**  *E* = −5.504 eV |
| MEP  maps | **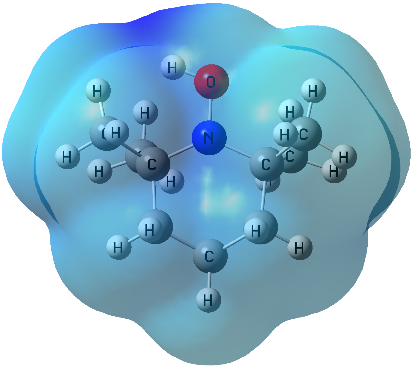** | **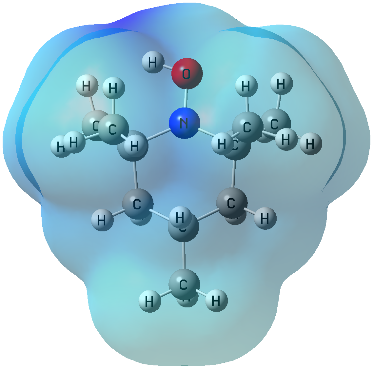** | **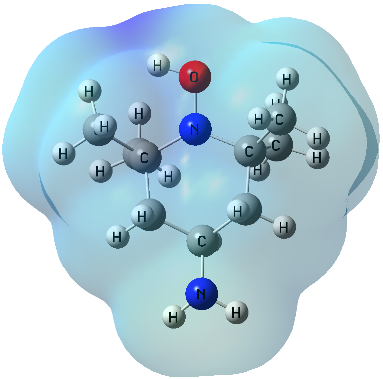** | **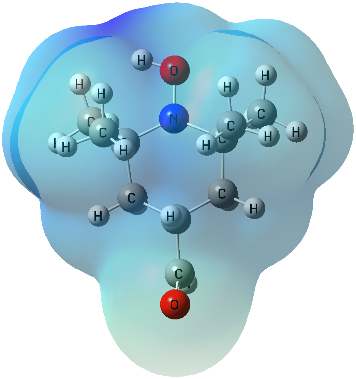** | **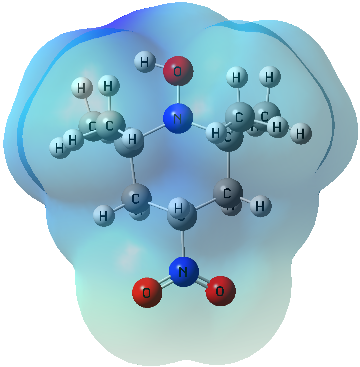** |

**Figure S2.** The shapes of the HOMO and LUMO orbitals calculated at the B3LYP/6-311++G(d,p) level of theory for the **O-protonation** of the studied TEMPO derivatives.

| Optimized structure | X=H | X=CH3 | X=NH2 | X=CHO | X=NO2 |
| --- | --- | --- | --- | --- | --- |
| HOMO orbitals | **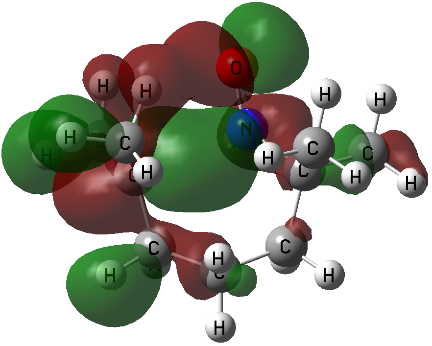**  *E* = −10.811 eV | **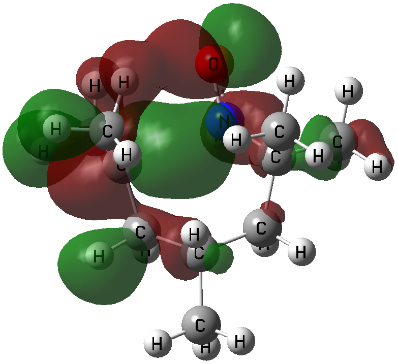**  *E* = −10.860 eV | **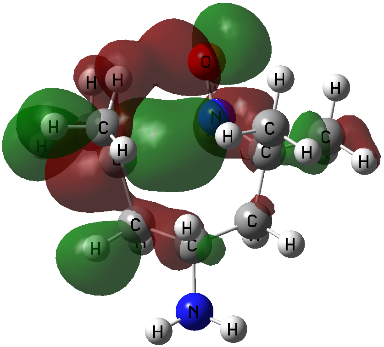**  *E* = −10.510 eV | **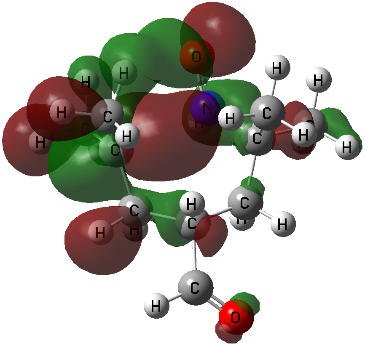**  *E* = −10.863 eV | **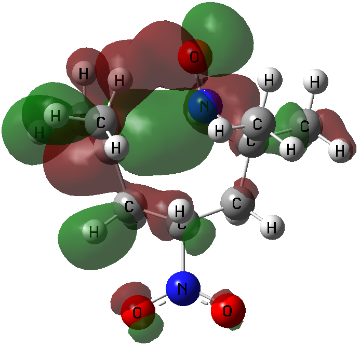**  *E* = −11.066 eV |
| LUMO orbitals | **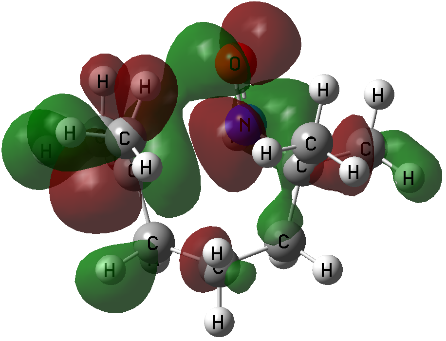**  *E* = −7.343 eV | **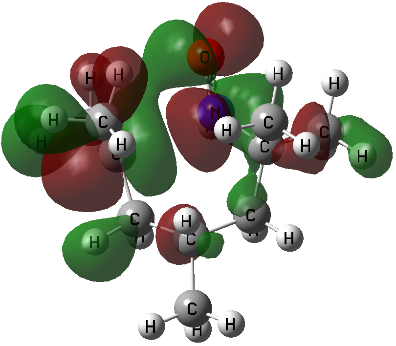**  *E* = −7.182 eV | **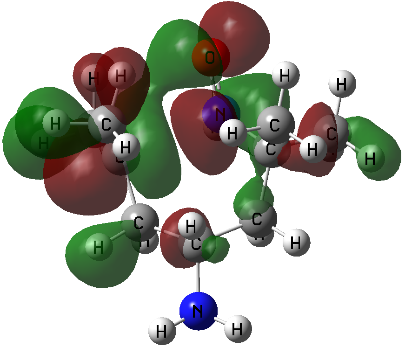**  *E* = −7.223 eV | **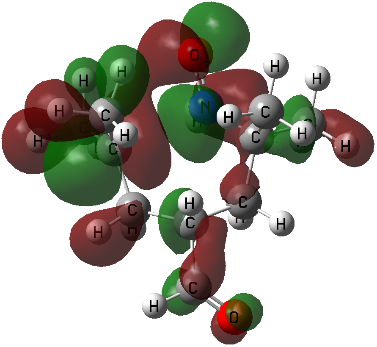**  *E* = −7.586 eV | **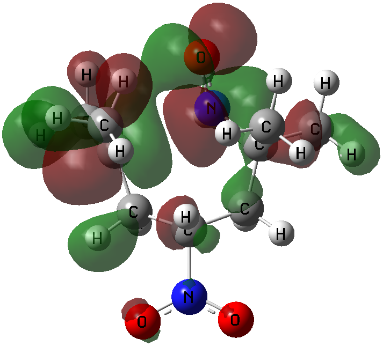**  *E* = −7.796 eV |
| MEP  maps | **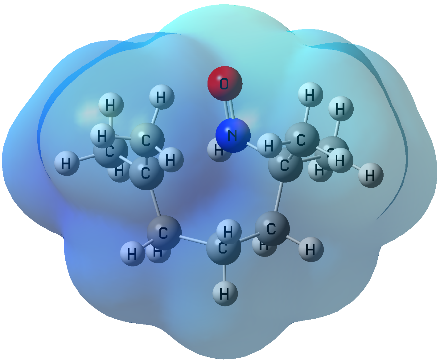** | **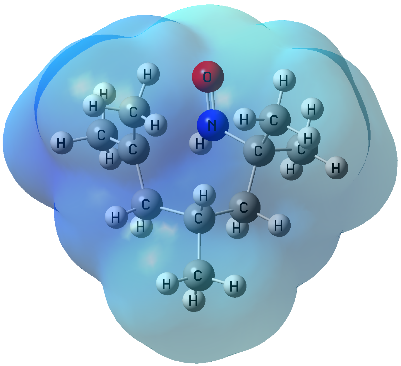** | **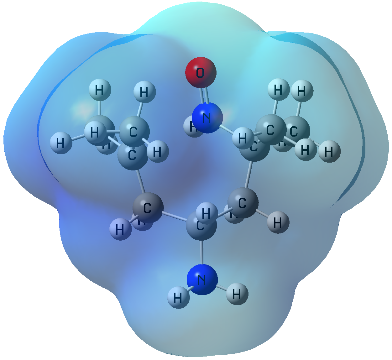** | **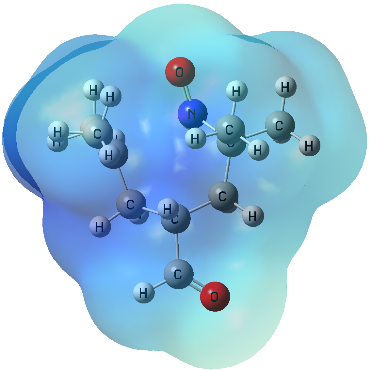** | **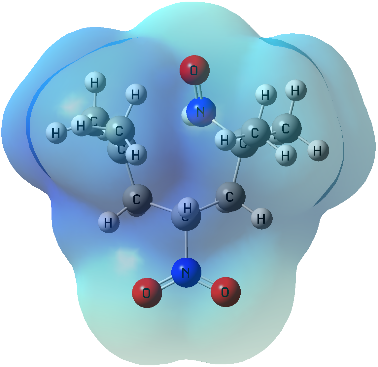** |

**Figure S3.** The shapes of the HOMO and LUMO orbitals calculated at the B3LYP/6-311++G(d,p) level of theory for the **N-protonation** of the studied TEMPO derivatives.


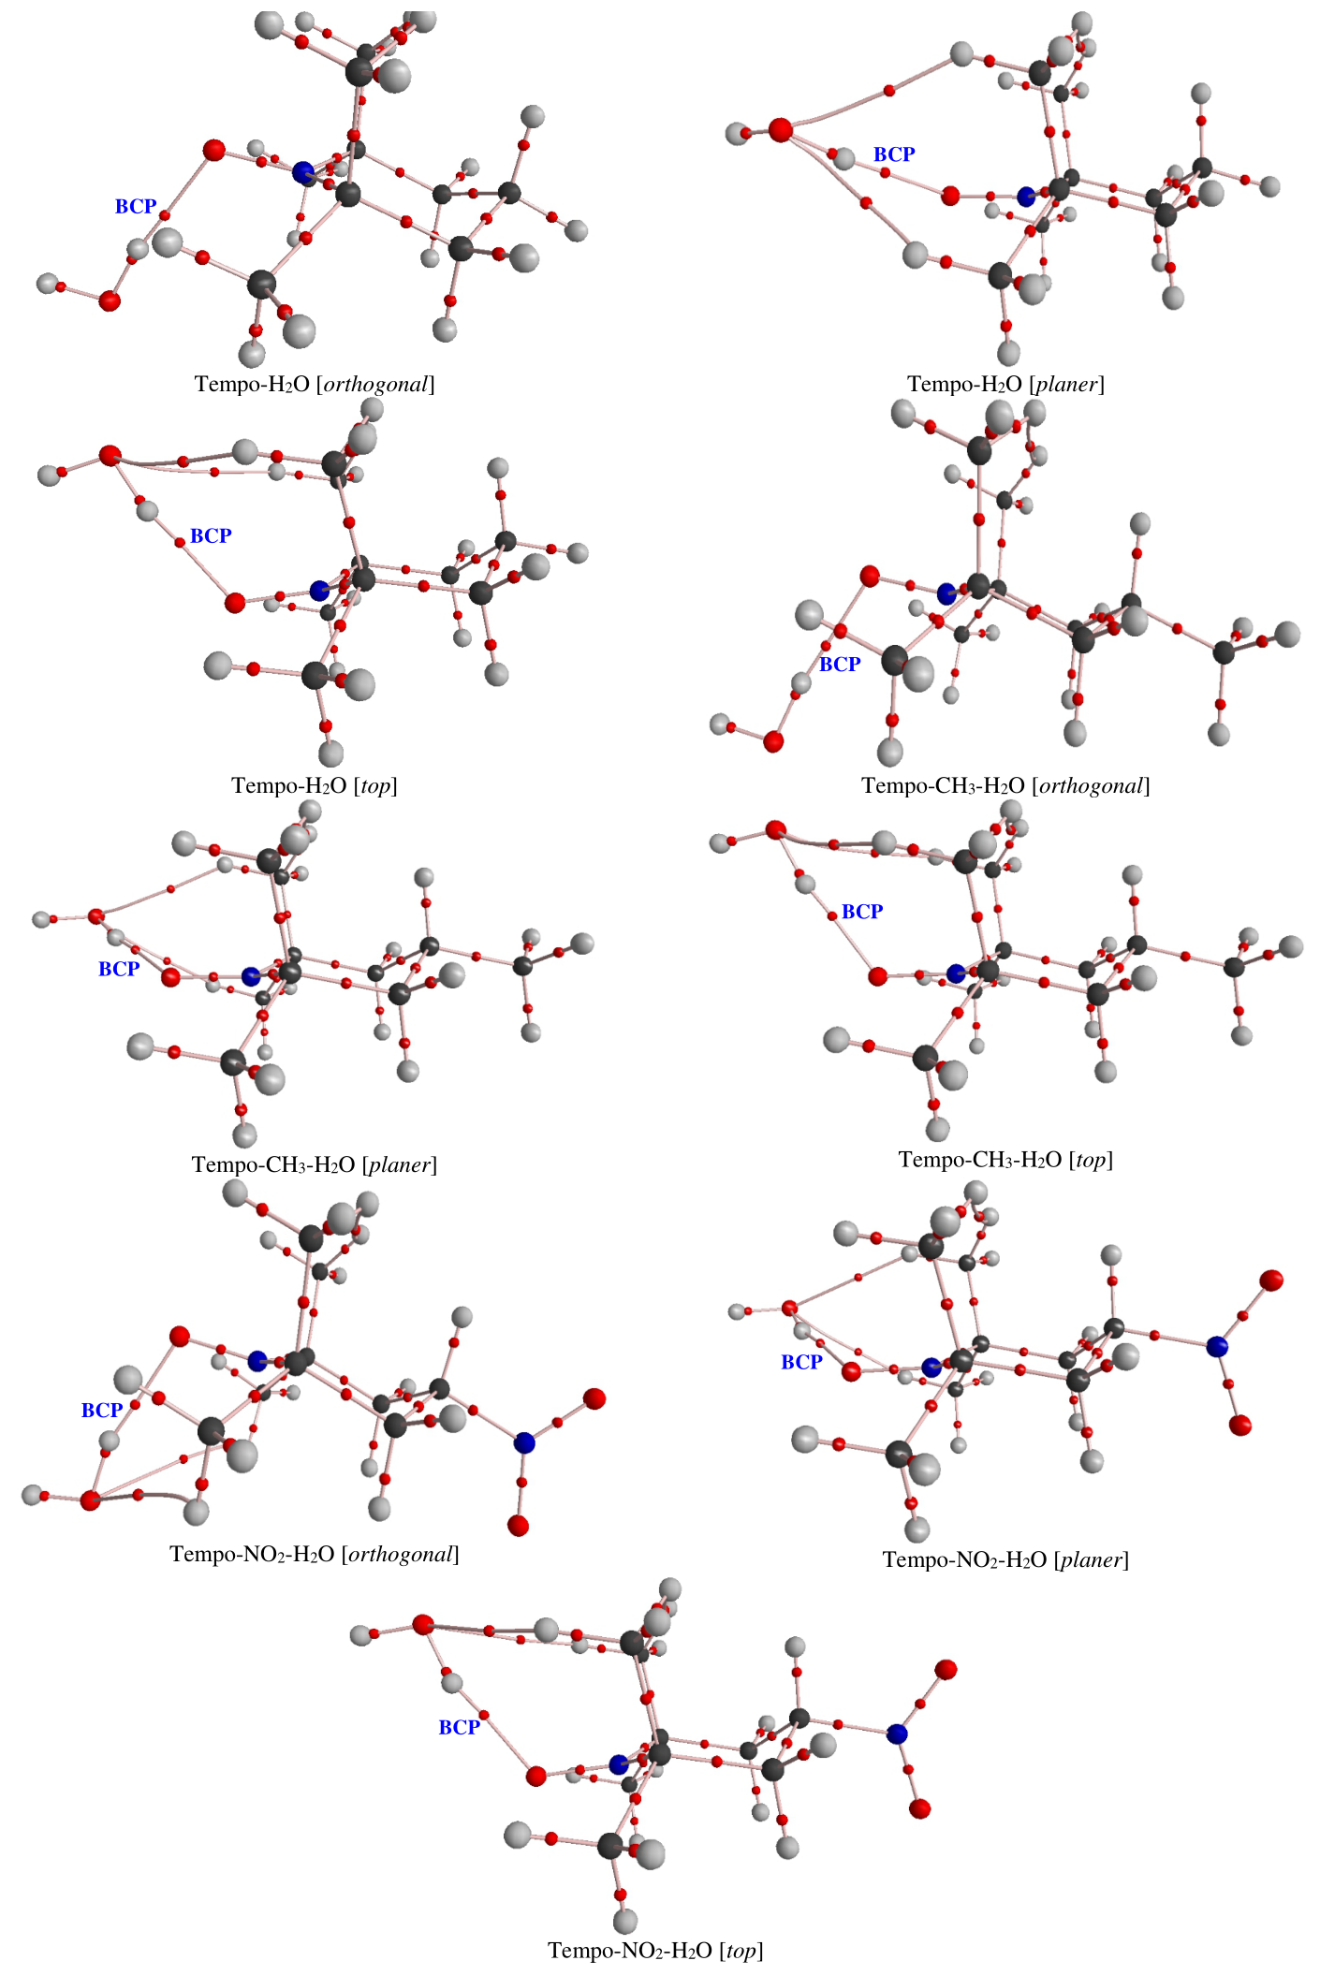
**Figure S4.** AIM features at the bond critical point of the some TEMPO derivatives (X: H, CH3, and NO2). The molecular graph was obtained at the B3LYP/6-311++G(d,p) level of theory.

1. 🖂 Corresponding authors:

   E-mails: abolfazl.shiroudi@pg.edu.pl (A. Shiroudi); Mohamed.Abdel-Rahman@sci.suezuni.edu.eg (M.A. Abdel-Rahman) [↑](#footnote-ref-1)
